# Supplementary material for: Diet containing stearic acid increased food intake in mice by reducing serum leptin compared with oleic acid
Source: Royal Society of Chemistry journal article supplement (doi:10.1039/d2fo03051a), 2022-12-22
Supplement: d2fo03051a6.xlsx [file d2fo03051a6.xlsx]

## Sheet: Sheet1
A	Fatty acid (mg/kg)	oleic acid	stearic acid
	Palmitic acid	7799.33	4884.87
	Stearic acid	1420.66	54971.2
	Oleic acid	55478.1	4956.57
	Linoleic acid	23711.3	13874.2
	α-Linoleic acid	954.83	697.39
B	Food intake (g)	OA										SA
	Week 1	17.69	20.41	20.63	19.54	13.84	18.2	15.72	16.42	19.28	11.32	20.29	18.99	23.54	21.83	24.09	18.73	20.3	22.63	14.73
	Week 2	24.35	21.15	23.26	23.3	22.79	22.6	21.29	23.12	22.99	23.81	23.62	24.81	25.73	20.61	24.1	25.93	25.03	24.25	26.02
	Week 3	20.6	20.55	21.96	21.07	20.28	20.4	17.91	20.48	19.87	19.75	21.7	22.3	23.2	23.15	26.18	20.01	21.33	22.62	17.74
	Week 4	22.01	18.31	19.32	20.45	18.34	19.89	17.41	16.84	19.52	17.99	22.4	22.29	24.27	23.55		22.22	26.67	21.23	19.29
	Week 5	19.12	18	19.42	20.15	19.88	18.94	17.64	19.36	19.7	18.49	24.25	20.42	23.58	22.37	26.74	20.27	21.72	22.16	19.18
	Week 6	18.93	18.8	20.01	20.59	18.36	20.03	16.9	19.64	19.69	19.43	20.96	24.36	23.39	24.5	24.13	22.44	22.68	22.63	21.55
	Week 7	22.65	20.3	21.76	21.9	19.5	21.13	21.42	19.77	22.23	20.12	26.69	24.49	26.95	26.51	28.05	24.39	27.96	25.41	22.4
	Week 8	22.08	20.03	20.98	20.79	20.58	20.8	17.68	19.36	21.51	16.38	23.67	21.78	24.04	22.57	26.48	22.71	22.81	24.35	21.44
	Week 9	22.47	19.1	18.46	19.27	17.23	20.63	16.95	18.6	19.42	19.32	24.04	23.67	25.48	24.63	27.73	24.34	26.14	26.56	20.29
C	Lean mass (%)	OA								SA
		70.744	75.797	74.057	73.11	73.033	69.679	70.898	68.915	70.635	69.561	76.962	73.117	75.004	72.773	67.03	71.409
D	Liver (g)	OA							SA
		1.6534	1.348	1.1869	1.2413	1.2609	1.1595	1.1076	1.1838	1.1258	1.2151	1.1351	1.2043	1.0624
E	eWAT (g)	OA							SA
		0.5192	0.4174	0.4885	0.2793	0.3403	0.4	0.2597	0.255	0.3695	0.3972	0.2591	0.2471	0.2175
F	Body weight (g)	OA										SA
	Week 1	21.85	20.12	20.12	19.24	19.07	17.65	17.48	17.12	16.28	14.45	20.42	20.32	20.05	19.59	18.84	17.72	17.38	17.18	14.87
	Week 2	20.34	20.23	19.83	19.03	19.38	17.54	15.94	16.15	17.84	13.36	20.39	18.37	20.87	20.56	19.44	16.74	17.25	17.97	14.66
	Week 3	21.72	20.66	20	20.25	20.15	18.18	17.92	19.21	19.16	18.19	20.43	19.9	21.52	20.29	20.13	18.9	18.37	18.91	17.47
	Week 4	21.94	21.15	20.6	20.98	21.52	19.8	18.13	20.91	19.9	19.98	21.23	20.34	22.75	21.38		18.62	18.25	19.75	18.21
	Week 5	24.71	22.5	22.86	23.16	23.62	21.88	19.84	21.23	21.65	21.06	23.4	21.33	23.87	22.2	23.2	21.04	20.59	20.88	19.45
	Week 6	24.7	22.59	23.13	23.68	23.62	23.2	19.58	22.88	22.43	22.63	23.41	22.07	24.76	23.34	23.56	21.05	21.16	22.42	20.69
	Week 7	25.75	23.32	23.65	23.7	23.58	22.68	20.78	22.3	22.69	22.87	24.36	23.33	25.01	23.64	24.3	20.95	23.17	22.29	22.23
	Week 8	25.95	23.98	24.8	24.15	24.59	23.39	20.92	23.17	23.46	22.83	24.69	23.56	25.65	24.11	24.87	21.34	22.11	21.63	22.02
	Week 9	26.76	24.16	24.46	24.55	24.31	23.97	21.44	23.23	23.62	23.91	24.58	24.31	25.58	25.02	25.5	20.98	24.18	23.85	22.49
G	Fat mass (%)	OA								SA
		11.773	7.851	6.747	8.131	11.839	12.137	10.28	13.911	6.587	9.222	8.695	7.296	11.274	8.52	10.493	10.376
H	BAT (g)	OA							SA
		1.6534	1.348	1.1869	1.2413	1.2609	1.1595	1.1076	1.1838	1.1258	1.2151	1.1351	1.2043	1.0624
I	iWAT (g)	OA						SA
		0.1838	0.156	0.2017	0.1924	0.1287	0.1422	0.189	0.1652	0.193	0.121	0.194	0.189
G	Time (h)	OA								SA
	0	2.62413	2.23752	2.60659	3.49373	2.55589	2.80066	2.91786	2.9964	2.55589	3.04518	2.91786	2.9964	3.02217	3.16786	2.91676	3.29892
	1	2.73115	2.88583	3.12214	3.14415	2.80347	2.80958	3.3896	3.0835	2.80347	3.5403	3.3896	3.0835	3.41534	3.56721	3.24931	3.39176
	2	3.59878	2.88134	4.66324	4.20234	2.98484	3.02254	3.19976	3.22651	2.98484	3.50897	3.19976	3.22651	3.27664	3.77022	3.16581	3.37019
	3	2.90152	3.5506	4.13143	4.15786	3.21659	3.2558	3.54073	3.21009	3.21659	3.58178	3.54073	3.21009	3.50612	4.30911	3.25392	3.67384
	4	2.69393	3.03552	3.92429	4.34282	3.2441	3.04209	3.57468	3.64524	3.2441	4.43229	3.57468	3.64524	3.99199	4.76434	3.60277	3.60876
	5	3.55856	3.98592	3.15287	3.96546	3.18164	3.21228	3.44701	3.5438	3.18164	4.57019	3.44701	3.5438	3.94407	4.74243	3.32311	4.00463
	6	3.42185	3.6224	4.46047	3.855	3.26632	3.15831	3.81194	4.24277	3.26632	4.25984	3.81194	4.24277	4.5454	5.27951	4.34852	4.20934
	7	2.6499	2.10851	3.7536	3.29829	3.1001	3.47121	3.34433	3.40614	3.1001	4.13428	3.34433	3.40614	3.58686	4.85638	3.18363	3.76071
	8	3.05338	3.44361	3.28286	3.66659	3.26353	2.9042	3.58074	3.83742	3.26353	3.80829	3.58074	3.83742	4.39644	3.69435	4.30412	4.47729
	9	3.30353	2.57124	3.10113	3.7384	3.09766	3.75483	3.56683	3.35241	3.09766	3.4637	3.56683	3.35241	3.74067	4.44872	3.70734	3.60028
	10	2.57066	2.4214	3.88638	3.47121	3.27134	2.86851	3.6278	4.14004	3.27134	3.71131	3.6278	4.14004	3.97331	4.36724	3.45825	3.66532
	11	3.23175	2.9255	3.03775	4.08502	3.05876	3.49306	3.03961	3.71566	3.05876	3.94123	3.03961	3.71566	3.9546	3.12278	3.47258	3.89311
	12	3.82746	3.42713	4.19516	3.90178	2.81029	2.89887	3.52313	3.50023	2.81029	3.64341	3.52313	3.50023	3.76168	4.17555	3.1636	3.67051
	13	2.79355	2.18534	2.79966	3.29251	3.41527	2.65984	3.87094	3.46449	3.41527	3.84044	3.87094	3.46449	3.52186	3.74762	3.55123	3.09691
	14	2.57643	3.1398	3.56263	3.26628	3.04897	2.99886	3.27404	3.45795	3.04897	2.79913	3.27404	3.45795	3.91438	3.35128	3.77025	3.61436
	15	2.29075	2.6343	2.92034	3.54187	3.78702	2.6225	3.66301	3.94221	3.78702	3.54787	3.66301	3.94221	3.96199	4.44112	3.08369	3.33936
	16	2.76477	2.65025	2.79419	2.94872	3.41244	3.50751	2.77021	3.28571	3.41244	2.63183	2.77021	3.28571	3.57122	4.43509	3.69352	3.97168
	17	2.4645	2.44102	3.23751	3.07551	3.15751	2.34481	3.41601	3.13162	3.15751	3.15374	3.41601	3.13162	4.25448	3.08044	3.39762	3.16295
	18	2.18553	2.41454	2.44833	3.75028	2.73744	2.96443	3.20138	2.84353	2.73744	2.94252	3.20138	2.84353	3.3192	3.95895	2.99945	3.64439
	19	2.21985	2.52122	3.10399	3.19997	2.52261	2.60005	2.85842	3.18788	2.52261	3.04509	2.85842	3.18788	3.61086	2.95312	2.94678	3.01739
	20	2.19745	2.34186	2.48012	2.99713	2.56419	2.68576	3.24537	2.63811	2.56419	2.97566	3.24537	2.63811	3.47814	2.92134	3.51348	3.1974
	21	2.76513	2.89673	2.94182	3.18778	2.10293	2.75772	2.60907	3.33379	2.10293	2.81416	2.60907	3.33379	3.29383	3.77295	2.69306	2.88169
	22	2.26901	2.44614	2.71966	2.7612	2.26618	2.72654	2.5623	2.70032	2.26618	2.83129	2.5623	2.70032	3.22991	3.31798	2.84229	2.86376
	23	2.38859	2.3737	3.30538	3.16818	2.5727	2.55939	3.18562	3.17038	2.5727	3.1406	3.18562	3.17038	2.91846	2.92981	3.07057	3.28789
	24	2.71702	2.30949	2.75261	3.54044	2.06814	2.45267	2.54026	2.55803	2.06814	3.37341	2.54026	2.55803	2.80297	3.71847	2.80756	2.78088
	25	2.73115	2.88583	3.12214	3.14415	2.44731	2.31805	2.9456	2.54307	2.44731	3.5403	2.9456	2.54307	3.47411	2.70422	3.10474	3.47358
	26	3.59878	2.88134	4.66324	4.20234	1.94055	2.39565	2.71284	2.91817	1.94055	3.50897	2.71284	2.91817	2.89904	3.43356	2.82226	2.89052
	27	2.90152	3.5506	4.13143	4.15786	3.04082	2.71688	2.76595	2.94172	3.04082	3.58178	2.76595	2.94172	3.67245	2.80455	3.944	3.16651
	28	2.69393	3.03552	3.92429	4.34282	3.64921	3.69817	3.76381	3.33243	3.64921	4.43229	3.76381	3.33243	4.24373	3.98675	4.5035	3.50812
	29	3.55856	3.98592	3.15287	3.96546	3.41446	2.9565	3.62231	3.7913	3.41446	4.57019	3.62231	3.7913	4.69762	4.64489	4.76478	4.37437
	30	3.42185	3.6224	4.46047	3.855	3.54365	4.00873	3.76909	3.95604	3.54365	4.25984	3.76909	3.95604	4.91705	4.53272	4.5212	4.74206
	31	2.6499	2.10851	3.7536	3.29829	3.02833	4.02274	3.58175	3.83532	3.02833	4.13428	3.58175	3.83532	4.84095	4.96588	4.59537	4.3955
	32	3.05338	3.44361	3.28286	3.66659	2.96649	3.1758	3.31304	3.34444	2.96649	3.80829	3.31304	3.34444	3.64157	4.01055	4.16107	3.84607
	33	3.30353	2.57124	3.10113	3.7384	2.92891	3.166	3.53875	3.21767	2.92891	3.4637	3.53875	3.21767	3.83743	3.53585	3.60813	3.76302
	34	2.57066	2.4214	3.88638	3.47121	3.09057	3.32359	3.43583	3.24453	3.09057	3.71131	3.43583	3.24453	3.83013	3.56746	3.7904	3.74821
	35	3.23175	2.9255	3.03775	4.08502	3.71108	3.08569	3.46068	3.59712	3.71108	3.94123	3.46068	3.59712	3.88954	3.367	3.92705	4.26724
	36	3.82746	3.42713	4.19516	3.90178	2.91773	2.96268	3.30381	3.7812	2.91773	3.64341	3.30381	3.7812	3.37466	4.03235	3.58789	3.32807
	37	2.79355	2.18534	2.79966	3.29251	2.92622	3.09892	3.27325	3.26855	2.92622	3.84044	3.27325	3.26855	3.53323	3.00621	2.86428	3.52447
	38	2.57643	3.1398	3.56263	3.26628	3.0534	3.3358	3.43547	3.48219	3.0534	2.79913	3.43547	3.48219	3.62847	3.22782	3.83214	3.70567
	39	2.29075	2.6343	2.92034	3.54187	3.17501	3.0916	2.69855	2.83209	3.17501	3.54787	2.69855	2.83209	3.20061	3.79956	3.17972	3.20081
	40	2.76477	2.65025	2.79419	2.94872	3.01788	2.99963	2.85833	2.92828	3.01788	2.63183	2.85833	2.92828	3.68602	2.8321	3.11424	3.12969
	41	2.4645	2.44102	3.23751	3.07551	2.42465	2.57547	2.987	2.92856	2.42465	3.15374	2.987	2.92856	3.35231	3.6272	3.3066	3.32431
	42	2.18553	2.41454	2.44833	3.75028	2.24794	2.45787	2.96779	3.15106	2.24794	2.94252	2.96779	3.15106	2.9789	2.70939	3.05761	3.2626
	43	2.21985	2.52122	3.10399	3.19997	2.4614	2.98791	2.59947	2.46408	2.4614	3.04509	2.59947	2.46408	3.83556	3.84288	2.83365	2.94699
	44	2.19745	2.34186	2.48012	2.99713	2.25592	2.97528	2.61571	2.72848	2.25592	2.97566	2.61571	2.72848	3.03628	3.15721	3.01906	2.88462
	45	2.76513	2.89673	2.94182	3.18778	2.2488	2.54876	3.32853	2.47319	2.2488	2.81416	3.32853	2.47319	3.6034	2.87914	3.11405	3.33431
	46	2.26901	2.44614	2.71966	2.7612	2.1442	2.31456	2.4382	2.88296	2.1442	2.83129	2.4382	2.88296	2.97958	3.60677	2.89418	2.83183
	47	2.38859	2.3737	3.30538	3.16818	2.39748	2.56935	2.81684	2.53204	2.39748	3.1406	2.81684	2.53204	2.87472	2.69444	2.92427	2.9285
	48	3.47738	2.50517	3.55203	2.95099	3.03101	2.24831	2.69951	2.80729	3.03101	4.49847	2.69951	2.80729	2.95125	3.56074	3.9354	2.87708
K	Cycle time	OA								SA
	dark	3.06793	3.18385	4.00686	4.06708	3.09485	3.15372	3.42518	3.53632	4.44441	4.01	3.69559	3.95867	3.7828	4.17567	3.49903	3.74645
	light	2.70255	2.5767	3.12173	3.32156	2.86398	2.77639	3.17425	3.22015	3.31265	3.29943	2.80063	2.94092	3.56614	3.59486	3.22698	3.3131
	dark	3.03387	2.98064	3.59622	3.78755	2.98965	3.10878	3.29194	3.27442	4.07029	3.83418	3.46491	3.42351	3.89656	3.78115	3.88118	3.74611
	light	2.55898	2.61795	3.04536	3.25785	2.59822	2.82614	2.94116	2.95439	3.21441	3.11774	2.71716	2.85704	3.34031	3.27949	3.14553	3.20001
L	Time (h)	OA								SA
	0	11.8758	13.4186	16.7748	14.9986	12.3554	13.69	13.7964	14.652	16.8215	13.5471	13.3105	14.9482	14.5956	15.3937	13.8993	15.5926
	1	12.3734	15.1917	16.3953	16.6028	13.5943	13.747	16.18	15.1389	17.0061	17.9425	14.4724	15.882	16.5451	17.1086	15.651	16.4909
	2	19.0126	19.2278	19.0573	24.0005	14.5633	14.7946	15.5028	15.8137	24.5021	23.5227	19.76	22.5814	16.0458	18.413	15.2088	16.4112
	3	18.1341	19.2774	21.9941	22.4084	15.7402	15.8718	17.2106	15.5316	22.9915	22.6354	21.9728	22.1225	17.1643	21.209	15.8922	17.7959
	4	13.1505	19.1968	23.1858	22.7919	15.8047	14.7438	17.3986	17.6606	25.1933	24.2167	21.8144	21.2973	19.6021	23.2391	17.6814	17.6362
	5	13.8568	16.8736	23.27	22.3472	15.5137	15.5875	16.6944	17.3408	24.6869	19.1619	19.2388	20.6015	19.4757	23.2965	16.3404	19.6452
	6	17.434	16.9312	23.3042	20.7388	15.7151	15.3172	18.4489	20.7171	24.0433	14.9538	19.2195	20.9585	22.4396	25.949	21.423	20.6909
	7	18.0499	13.1881	20.4594	19.8861	14.7838	16.8728	16.0804	16.514	23.6027	23.6242	19.629	17.2116	17.5947	23.7719	15.5287	18.4051
	8	12.5153	12.8453	16.9739	15.548	15.487	14.0139	17.1079	18.6264	21.3628	18.9704	16.2955	17.7069	21.5973	17.7942	21.0898	21.9567
	9	14.1488	12.2416	16.2653	17.9065	14.6579	18.2093	16.9568	16.0504	19.6509	15.1383	17.0399	21.8281	18.4338	21.2835	18.0011	17.5524
	10	16.8626	12.2265	16.2654	20.6746	15.6325	13.8045	17.3562	19.7464	23.3652	19.0519	17.5975	20.8073	19.5238	21.0714	16.6881	17.8183
	11	14.4557	16.6677	20.5953	19.2436	14.6935	16.8608	14.3233	17.7254	18.6551	23.0124	17.1422	17.5808	19.4509	14.6627	16.8411	18.9613
	12	18.4179	12.0211	21.4669	20.9027	13.5868	13.8757	16.774	16.8238	22.9664	21.6078	18.4823	20.3524	18.4469	20.0422	15.3171	17.6478
	13	16.6508	15.9768	16.8736	20.8834	16.5428	12.7504	18.5921	16.7451	17.7558	19.3067	16.921	14.5462	17.2436	17.9595	17.0084	14.7317
	14	15.559	11.314	14.7126	18.1847	14.5834	14.4563	15.6989	16.7652	14.5835	14.8879	13.0722	14.6461	19.1176	15.8956	18.2762	17.2117
	15	12.2627	13.7194	15.6195	14.1273	18.253	12.6351	17.5981	19.0279	17.6073	17.1463	14.2531	16.8955	19.1816	21.1139	14.9105	15.7105
	16	14.7164	12.0855	14.7244	16.9015	16.2988	16.9601	13.1744	15.5802	14.8975	13.4743	13.201	13.0636	17.1109	21.1972	17.8603	19.1349
	17	11.4546	12.7152	12.6912	13.9419	15.1391	11.2342	16.3552	14.8106	15.4226	15.5618	12.438	12.5565	20.3384	14.3541	16.3949	15.1532
	18	11.8171	11.1553	16.1781	14.7988	13.1039	14.3172	15.3204	13.3233	16.6401	13.5847	13.1303	14.3705	15.7865	18.726	14.561	17.563
	19	12.5523	11.0612	13.194	15.787	12.1716	12.4226	13.4832	15.1467	13.888	14.2276	11.7668	11.9273	17.224	13.718	14.3149	14.6399
	20	11.6679	15.4244	13.7321	13.812	12.4801	12.8156	15.4707	12.5061	15.5348	18.2118	14.7016	13.1456	16.6	13.6033	17.1545	15.5976
	21	10.7979	10.5139	15.1873	14.3044	10.1772	13.3407	12.5437	15.8266	13.557	13.5028	12.4563	12.6096	15.6608	17.9547	13.1118	14.0221
	22	12.0227	10.8663	14.454	14.9384	10.941	13.3077	12.2458	12.7122	14.4288	16.2089	12.4949	13.3605	15.258	15.91	13.8641	13.8451
	23	10.599	12.3991	13.4065	12.8618	12.4315	12.511	15.2752	14.9859	13.9286	12.4775	11.3366	11.982	13.7195	13.8373	14.983	15.7802
	24	13.0956	10.7816	12.761	16.817	10.0099	12.0473	12.06	12.3966	14.2848	14.6415	13.3633	13.9907	13.0882	17.7193	13.5702	13.3215
	25	13.6375	13.9939	15.2698	14.94	11.8218	11.38	13.882	12.2409	17.0663	17.2474	13.8973	17.1824	16.6888	12.6354	14.9385	16.9055
	26	17.977	14.1651	22.7262	20.5334	9.4475	11.7236	12.9782	14.242	19.7507	17.2241	20.4061	18.8678	13.9575	16.1438	13.5066	13.9382
	27	14.3422	17.608	20.3694	20.3749	14.7929	13.2534	13.2219	14.2834	22.6077	17.7571	21.9517	15.669	17.5504	13.0983	19.3154	15.0638
	28	13.0119	15.077	19.3976	21.3747	17.8159	17.7906	18.2877	16.2079	20.8941	21.925	20.4924	16.1622	20.6555	18.6751	21.9621	17.1928
	29	17.0613	19.8193	15.4508	19.4742	16.6537	14.0308	17.7168	18.3943	23.12	22.6846	17.4215	19.5021	22.9079	22.2614	23.1695	21.6059
	30	16.719	17.995	22.0193	19.0368	17.2579	19.4756	18.5177	19.3389	19.6598	21.1343	18.8877	18.6486	24.266	21.9557	22.2635	23.374
	31	12.8828	10.4444	18.4578	16.2399	14.5642	19.5769	17.3992	18.684	22.7654	20.5655	14.461	13.3072	23.9163	24.3209	22.6377	21.662
	32	14.8418	17.0412	16.0133	18.1136	14.1534	15.445	15.8992	16.2701	17.7181	18.8432	14.2772	19.2512	17.8924	19.6451	20.3337	18.879
	33	15.9896	12.5261	15.2266	18.2394	14.0099	15.3493	17.1198	15.6758	22.5647	16.9645	16.0409	16.3494	18.799	17.3137	17.2445	18.5576
	34	12.7113	11.74	19.065	16.856	14.8603	16.163	16.4548	15.6726	19.649	17.9138	17.3328	19.1136	18.8308	17.3374	18.1562	18.3761
	35	16.005	14.459	14.9705	20.0453	18.0586	14.9805	16.6349	17.3892	20.9186	19.3623	16.4175	15.2089	18.9874	16.2177	18.7336	20.9183
	36	18.7774	16.8182	20.7627	18.9904	13.9792	14.2162	15.757	18.4171	18.1907	17.9274	14.5287	17.6681	16.087	19.5912	17.1328	16.2809
	37	13.6516	10.5789	13.6417	15.9059	14.1141	14.7121	15.7063	15.912	17.1683	18.8192	15.1598	12.4397	17.2003	14.2926	13.7227	17.0682
	38	12.6377	15.409	17.4153	15.7278	14.6972	15.9506	16.4582	16.8323	16.7192	13.3827	11.9381	13.7883	17.5688	15.2195	18.476	18.0296
	39	11.3976	12.9652	14.2666	17.3028	15.3095	14.8806	12.8691	13.5259	15.7533	17.163	13.3144	15.7837	15.7605	18.4939	15.4228	15.5394
	40	13.5801	13.0127	13.6671	14.1636	14.513	14.2724	13.7455	13.7785	13.308	12.6249	14.1281	12.8302	17.984	13.48	15.2243	14.904
	41	11.8538	11.9372	15.8639	14.6935	11.7169	12.2306	14.2633	14.0782	17.4224	15.3669	11.8662	12.7258	16.2509	17.5039	15.9944	16.2652
	42	10.4478	11.9159	11.9613	18.2116	10.933	11.5323	14.3102	15.0835	14.8643	14.1494	13.172	13.9267	14.2207	12.8002	14.9057	16.0267
	43	10.6069	12.476	15.1861	15.5414	11.93	14.1528	12.4894	11.6139	14.7702	14.7246	13.0883	12.4235	18.415	18.4582	13.5698	14.4724
	44	10.4724	11.5511	12.079	14.6196	10.9153	13.9865	12.3801	12.898	14.1863	14.3181	11.9168	15.2515	14.4665	14.8851	14.3309	13.9191
	45	13.2009	14.2809	14.3632	15.4927	10.9362	12.1844	15.9609	11.7023	15.2866	13.4463	13.4978	12.4882	17.2348	13.5454	14.9904	16.0265
	46	10.7406	12.0156	13.2977	13.2425	10.442	11.009	11.7161	13.8309	14.3033	13.8896	11.6585	14.2174	14.2805	17.1941	13.7664	13.3867
	47	11.2591	11.5208	16.0301	15.1114	11.6925	12.256	13.524	12.0747	14.2254	15.2223	13.3257	12.9643	13.5951	12.5916	13.8359	13.9017
	48	16.6031	12.0588	17.3993	13.8705	14.809	10.9017	12.9048	13.2993	13.3931	21.7781	14.7785	14.1534	13.9004	16.6122	18.7654	13.5588
M	Cycle time	OA								SA
	dark		15.1623	15.6265	19.5602	19.771	14.9154	15.3129	16.4452	17.1408	21.8336	19.6823	18.1259	19.4466	18.5567	20.27	17.0219	18.2473
	light		13.2206	12.4212	15.1715	15.9604	13.7982	13.3842	15.1759	15.3484	15.9382	15.8254	13.6988	14.1431	17.1212	17.0489	15.6463	15.9236
	dark		14.8829	14.6782	17.6565	18.5162	14.4723	15.093	15.8698	15.9063	20.0937	18.8612	17.0767	16.9385	18.9677	18.1558	18.829	18.3162
	light		12.3683	12.8493	14.8924	15.7524	12.5614	13.448	14.0865	14.1448	15.5183	15.1048	13.1405	13.8827	16.0897	15.6432	15.1213	15.4841
N	Time (h)	OA								SA
	0	2.24709	2.22284	2.58911	2.42925	2.06395	2.3995	2.07636	2.57228	2.72764	2.09075	2.14626	2.33393	2.42794	2.6307	2.17388	2.34318
	1	2.33969	2.65371	2.55354	2.85923	2.30118	2.41852	2.55119	2.70023	2.81157	2.91669	2.34177	2.68452	2.78962	2.75868	2.57339	2.82483
	2	3.51273	3.46462	3.23617	3.95913	2.53148	2.60893	2.61582	2.8009	4.34766	4.04934	3.61452	3.87269	2.83242	3.20702	2.47062	2.83116
	3	3.311	3.51708	3.92462	3.93311	2.76966	2.74921	2.94459	2.60473	4.2324	4.08417	4.11536	4.06841	3.02499	3.8222	2.77577	2.99566
	4	2.39041	3.50899	4.21918	3.70519	2.72562	2.49538	2.99294	2.97863	4.47976	4.44534	4.06521	3.92978	3.49898	4.03548	3.14906	3.08101
	5	2.58464	3.05906	4.20155	3.66543	2.68985	2.64711	2.81165	3.05162	4.51481	3.49851	3.5326	3.85552	3.55578	4.1653	2.93267	3.49273
	6	3.22994	3.05726	4.20087	3.58113	2.57067	2.59529	3.09917	3.61347	4.38317	2.69117	3.43818	3.92665	4.09295	4.64695	3.87588	3.70936
	7	3.30707	2.27876	3.6556	3.4539	2.32009	2.88684	2.62162	2.79402	4.30762	4.43994	3.49671	3.16724	3.12696	4.18887	2.69593	3.24116
	8	2.14315	2.16202	2.91717	2.62563	2.37386	2.32134	2.70975	3.1673	3.94845	3.50902	2.69746	3.25664	3.86175	2.9242	3.73233	3.89766
	9	2.52072	2.18291	2.77654	3.14942	2.21518	3.08475	2.61965	2.56641	3.60527	2.76713	2.93072	3.90936	3.3381	3.39161	3.06549	3.04113
	10	3.04935	2.23107	2.85449	3.72715	2.47764	2.25974	2.76405	3.10176	4.20959	3.49945	3.16281	3.69875	3.49464	3.49043	2.76602	3.05001
	11	2.68272	3.01707	3.71856	3.49819	2.38572	2.79858	2.12	2.78688	3.26017	4.19166	3.10036	3.05499	3.49532	2.13069	2.85323	3.26994
	12	3.46207	2.10266	3.83798	3.76339	2.271	2.21628	2.61359	2.73853	4.17005	3.93855	3.35074	3.6473	3.27379	3.24332	2.57624	2.87747
	13	3.02486	2.77167	2.9318	3.57214	2.78799	2.05033	3.01639	2.79525	2.90377	3.34305	2.96725	2.25637	3.04193	2.88442	2.72448	2.28417
	14	2.73349	1.82694	2.45149	2.8471	2.32379	2.38501	2.52552	2.83674	2.26618	2.39464	2.27823	2.22237	3.33671	2.4302	3.08939	2.68193
	15	1.99129	2.2394	2.72302	2.02136	3.00933	2.07594	2.85939	3.15738	2.98876	2.79962	2.34217	2.86193	3.22555	3.26871	2.49288	2.30606
	16	2.46142	2.0176	2.55724	2.64426	2.57678	2.83621	2.04085	2.37924	2.4515	2.06603	2.36229	2.02423	2.74571	3.36189	2.98982	3.1489
	17	1.93238	2.07616	2.18787	2.08196	2.43705	1.80283	2.61047	2.23206	2.51266	2.34723	2.30101	1.9356	3.23073	2.00179	2.71648	2.43039
	18	1.87231	1.77213	2.79716	2.27345	2.09359	2.37933	2.4442	1.9141	2.75498	2.00742	2.3349	2.3874	2.44609	2.82377	2.4757	2.89366
	19	2.08297	1.66623	2.13076	2.597	2.01626	1.9662	2.00624	2.33445	2.10723	2.12299	2.00797	1.87155	2.70622	1.88031	2.44249	2.48484
	20	2.09429	2.55383	2.23245	2.34443	2.14735	2.01732	2.42454	1.90595	2.43074	2.95134	2.55045	2.02411	2.61532	1.89034	2.99084	2.71079
	21	1.95249	1.73142	2.5263	2.47197	1.70686	2.23535	2.0449	2.43066	2.14701	2.21923	2.00545	2.17405	2.42311	2.79012	2.25952	2.41104
	22	2.24345	1.78713	2.42474	2.47835	1.81809	2.31991	1.9433	1.8717	2.27979	2.65236	2.26349	2.19545	2.2869	2.56229	2.40829	2.31363
	23	2.00105	2.08213	2.3592	2.03544	2.07282	2.19254	2.46165	2.25268	2.26155	1.97564	2.08984	2.04926	2.00516	2.07142	2.60523	2.55185
	24	2.48717	1.77548	2.24995	2.75616	1.6815	2.15297	1.8543	2.09235	2.33911	2.39767	2.50021	2.54823	1.84614	2.77058	2.26552	2.13558
	25	2.5996	2.36971	2.68186	2.30413	1.96813	2.02969	2.05646	2.00682	2.92765	2.99154	2.48381	3.09829	2.70943	1.78807	2.44439	2.90807
	26	3.43126	2.54142	3.92984	3.59233	1.62778	2.06325	2.06867	2.48174	3.42095	3.08306	3.56396	3.26993	2.29041	2.37297	2.15567	2.30257
	27	2.62866	3.27147	3.6961	3.60672	2.54026	2.30219	2.09856	2.43207	4.03332	3.30642	3.84856	2.79365	2.78201	1.84975	3.41136	2.33844
	28	2.1654	2.81558	3.55503	3.85174	3.10669	2.90724	3.12371	2.78057	3.83511	4.04752	3.58864	3.01592	3.55448	2.68127	3.81013	3.04779
	29	2.74589	3.71678	2.73515	3.47692	2.89066	2.15223	3.11131	3.12208	4.33486	4.24357	3.17496	3.70764	3.97392	3.57582	3.97102	3.94804
	30	2.92368	3.36264	4.01521	3.47574	2.97678	3.32466	3.31326	3.38919	3.7064	3.94665	3.45632	3.53614	4.41976	3.69815	4.01916	4.23743
	31	2.20575	1.93012	3.3137	2.93458	2.38026	3.36703	2.9693	3.22725	4.27577	3.87925	2.6935	2.51178	4.37428	4.29947	4.09381	3.92256
	32	2.53817	3.13719	2.78057	3.31287	2.22628	2.64857	2.56988	2.79296	3.35573	3.48218	2.70311	3.61287	3.20161	3.47181	3.55794	3.36478
	33	2.68569	2.16284	2.71264	3.17171	2.2298	2.59742	2.87066	2.70817	4.24663	3.00942	2.96671	3.00713	3.32361	3.05509	2.73459	3.3715
	34	2.33233	1.98667	3.38968	2.87172	2.42282	2.76661	2.63584	2.6089	3.56537	2.98519	3.14225	3.55153	3.37854	2.96384	2.90945	3.26201
	35	2.95537	2.64809	2.711	3.56858	3.10427	2.54982	2.70979	2.90455	3.90177	3.47788	3.00893	2.74182	3.30811	2.66567	2.94468	3.70986
	36	3.34001	2.9944	3.82358	3.26723	2.24201	2.29692	2.47437	3.17781	3.27377	3.24074	2.50183	3.249	2.52039	3.34487	2.70609	2.86146
	37	2.38908	1.77792	2.36052	2.65015	2.33451	2.26009	2.53741	2.73977	2.89016	3.34457	2.39777	2.00072	2.96173	2.20855	2.20099	2.8727
	38	2.24656	2.74375	3.0531	2.58183	2.40725	2.53547	2.63871	2.81083	2.77557	2.13506	1.86738	2.33862	2.96274	2.25538	3.05023	3.09469
	39	2.14259	2.33649	2.49205	3.02407	2.52884	2.43911	2.02006	2.13776	2.56023	2.88868	2.26095	2.7364	2.84614	3.18239	2.61328	2.64454
	40	2.42315	2.32147	2.40117	2.29854	2.36851	2.21632	2.24212	2.02395	2.06195	2.04613	2.46535	2.21119	3.12574	2.09686	2.66931	2.32393
	41	1.93697	2.09478	2.80676	2.32911	1.95352	1.88184	2.25291	2.29383	2.89955	2.66681	2.06473	2.03859	2.74941	2.90241	2.6777	2.86039
	42	1.65882	2.17019	2.09167	3.10509	1.87215	1.66897	2.3638	2.40982	2.37523	2.31814	2.24714	2.40052	2.24631	1.91994	2.58194	2.86496
	43	1.68016	2.29712	2.66962	2.65057	2.01598	2.15196	2.03012	1.72085	2.41094	2.47305	2.14706	2.09546	2.9853	2.9995	2.17128	2.58418
	44	1.63797	2.09933	2.0846	2.54017	1.83067	2.04433	1.87259	1.93928	2.38575	2.35251	2.0581	2.72514	2.26155	2.20915	2.19909	2.30601
	45	2.08161	2.59086	2.5046	2.64936	1.87464	1.9349	2.57076	1.7686	2.5793	2.13776	2.28496	2.13314	2.7452	1.98757	2.45715	2.60961
	46	1.62606	2.14769	2.33229	2.1355	1.80106	1.70644	1.9056	2.23282	2.36752	2.47931	1.8256	2.34457	2.29488	2.69338	2.13434	2.01306
	47	1.66878	1.95843	2.71757	2.37424	2.02909	1.92554	2.19058	1.89493	2.34815	2.58361	2.25451	2.16849	2.04861	1.78488	2.08952	2.13548
	48	2.61286	1.97618	3.0748	2.02673	2.58928	1.84351	2.05632	2.02074	2.13295	3.67702	2.53181	2.24637	2.051	2.33236	2.94504	2.00755
O	Cycle time	OA								SA
	dark		2.77721	2.78387	3.40788	3.38395	2.45807	2.60765	2.66412	2.89708	3.90435	3.50713	3.22026	3.47689	3.29897	3.44814	2.92241	3.14878
	light		2.32359	2.04922	2.59383	2.59505	2.27062	2.20837	2.41067	2.40311	2.60672	2.55182	2.4064	2.30828	2.77315	2.60534	2.64812	2.59196
	dark		2.64596	2.65051	3.14996	3.24544	2.43226	2.56899	2.61874	2.7141	3.66431	3.3912	3.09358	3.11616	3.26522	2.94235	3.19464	3.21227
	light		2.06455	2.28926	2.6136	2.63401	2.09929	2.08874	2.25623	2.26182	2.57713	2.54773	2.19911	2.37173	2.64514	2.45817	2.46366	2.59753
P	Time (h)	OA								SA
	0	0.944193	0.799739	0.734936	0.777322	0.806221	0.856364	0.709012	0.856459	0.778695	0.731064	0.773695	0.742129	0.802889	0.831827	0.744833	0.702147
	1	0.941243	0.847317	0.736618	0.834906	0.81985	0.861194	0.746076	0.87357	0.792719	0.781086	0.765746	0.817707	0.818488	0.771398	0.792793	0.83217
	2	0.915225	0.886668	0.823247	0.794006	0.847837	0.86205	0.816807	0.86713	0.868545	0.831415	0.903328	0.832978	0.866418	0.851186	0.783458	0.837655
	3	0.900264	0.900876	0.876067	0.858557	0.860382	0.843053	0.831014	0.811427	0.909937	0.882196	0.930772	0.90923	0.862864	0.886345	0.85348	0.813756
	4	0.895089	0.901415	0.897082	0.780783	0.838005	0.818792	0.835917	0.815896	0.870194	0.902293	0.924928	0.913359	0.875678	0.84484	0.873356	0.853679
	5	0.926977	0.892899	0.889559	0.789558	0.844918	0.823274	0.813779	0.858248	0.903168	0.896379	0.907563	0.929887	0.903204	0.876906	0.882316	0.869699
	6	0.918152	0.888832	0.886645	0.839914	0.786233	0.821019	0.808435	0.851408	0.900035	0.880618	0.878226	0.931071	0.900279	0.879074	0.890898	0.879459
	7	0.905358	0.839408	0.877437	0.846829	0.748219	0.829421	0.780205	0.819551	0.900485	0.929129	0.872904	0.910437	0.871618	0.861007	0.843895	0.857609
	8	0.82765	0.803256	0.832617	0.817836	0.72517	0.798036	0.753406	0.824775	0.912076	0.910525	0.795879	0.910177	0.876939	0.784566	0.866298	0.868592
	9	0.873654	0.875688	0.824377	0.859234	0.714189	0.818994	0.726554	0.763618	0.906466	0.898603	0.831575	0.880821	0.890028	0.763388	0.825925	0.841942
	10	0.889814	0.899174	0.85654	0.887525	0.757648	0.784898	0.75778	0.748394	0.889388	0.903041	0.882808	0.871253	0.878389	0.796337	0.797976	0.825691
	11	0.919658	0.890041	0.885978	0.894369	0.778643	0.799221	0.694557	0.742402	0.851923	0.893356	0.891621	0.843984	0.883796	0.681378	0.820808	0.832815
	12	0.93573	0.853637	0.879085	0.884327	0.807739	0.763485	0.735135	0.778103	0.894123	0.892916	0.892004	0.88014	0.867832	0.759589	0.813516	0.780581
	13	0.895801	0.842973	0.841853	0.829187	0.816552	0.770811	0.774935	0.805832	0.783448	0.839137	0.856805	0.737198	0.864527	0.761846	0.762777	0.737012
	14	0.857833	0.77518	0.800638	0.74341	0.761142	0.794475	0.768013	0.820443	0.737802	0.763726	0.848818	0.718206	0.849962	0.723452	0.817016	0.737095
	15	0.780025	0.780915	0.850618	0.668966	0.791313	0.791647	0.777552	0.799679	0.826601	0.776443	0.787004	0.82093	0.808537	0.720667	0.806314	0.685503
	16	0.809119	0.805955	0.842062	0.743325	0.753835	0.80497	0.736874	0.722058	0.793472	0.723044	0.879955	0.738467	0.768476	0.757117	0.808034	0.794078
	17	0.818349	0.783618	0.835773	0.705422	0.770665	0.767844	0.762322	0.70829	0.778481	0.707714	0.916997	0.729769	0.759556	0.650838	0.795078	0.768272
	18	0.755282	0.761014	0.839672	0.728291	0.762744	0.802144	0.758469	0.673873	0.79757	0.691183	0.866533	0.803846	0.7361	0.705471	0.826875	0.792709
	19	0.800554	0.712506	0.772588	0.789276	0.800199	0.755208	0.702137	0.730851	0.717713	0.698894	0.830125	0.748933	0.747859	0.633076	0.830262	0.822576
	20	0.885425	0.800626	0.778758	0.824034	0.837152	0.748671	0.744655	0.722115	0.745952	0.777633	0.849917	0.726279	0.75214	0.647186	0.849184	0.847344
	21	0.891784	0.793335	0.803868	0.840337	0.813514	0.80902	0.784463	0.727965	0.755861	0.787859	0.766817	0.838432	0.734551	0.730129	0.842031	0.837015
	22	0.928946	0.790204	0.799023	0.798245	0.800308	0.851747	0.759001	0.688152	0.751768	0.775901	0.894821	0.786913	0.701647	0.770234	0.849104	0.807427
	23	0.940788	0.813277	0.858188	0.756784	0.800174	0.855998	0.77143	0.705119	0.778912	0.749955	0.916435	0.830748	0.682066	0.706485	0.848383	0.775705
	24	0.948423	0.793524	0.863986	0.785752	0.813484	0.879005	0.727064	0.817636	0.786073	0.778631	0.927114	0.899625	0.659387	0.745486	0.806733	0.768361
	25	0.952379	0.823725	0.852889	0.732076	0.8018	0.876474	0.69466	0.787793	0.826711	0.840535	0.875289	0.887443	0.77964	0.662907	0.78624	0.835622
	26	0.954718	0.882791	0.842732	0.854811	0.840756	0.861837	0.756131	0.850116	0.843883	0.873514	0.85201	0.843989	0.789756	0.685473	0.765009	0.794772
	27	0.904947	0.920652	0.894673	0.866281	0.8315	0.847962	0.756182	0.82476	0.876201	0.91871	0.856371	0.876713	0.756133	0.656643	0.862968	0.730715
	28	0.800316	0.926604	0.905563	0.887455	0.851057	0.7845	0.830363	0.839116	0.906884	0.907842	0.856236	0.928051	0.835874	0.667979	0.845769	0.869323
	29	0.771952	0.932532	0.862315	0.876271	0.846371	0.727773	0.855186	0.822057	0.932393	0.923849	0.89833	0.948434	0.842882	0.766387	0.833184	0.903864
	30	0.851231	0.928334	0.900137	0.900062	0.839976	0.829636	0.87841	0.855373	0.938165	0.922151	0.89639	0.944618	0.898435	0.815474	0.888807	0.893011
	31	0.828075	0.917715	0.879286	0.889442	0.784408	0.836518	0.829212	0.840358	0.933254	0.933205	0.925931	0.940835	0.903344	0.865435	0.890812	0.892006
	32	0.83085	0.910389	0.842027	0.900679	0.749579	0.832735	0.772464	0.831863	0.944223	0.905741	0.944551	0.932251	0.877848	0.86223	0.853424	0.873279
	33	0.804287	0.8376	0.874148	0.846061	0.759917	0.820946	0.806414	0.842021	0.935661	0.863796	0.913074	0.910377	0.864034	0.86654	0.761761	0.895344
	34	0.906589	0.817987	0.871886	0.826742	0.782373	0.828926	0.765726	0.803906	0.895171	0.796884	0.892327	0.920447	0.880769	0.823338	0.763361	0.868266
	35	0.914484	0.903177	0.892043	0.8733	0.8349	0.824937	0.780374	0.807375	0.926211	0.879621	0.90555	0.88736	0.846927	0.784492	0.746422	0.869224
	36	0.871146	0.869324	0.908354	0.833027	0.765504	0.77342	0.747752	0.838628	0.877863	0.884391	0.825827	0.906555	0.745165	0.819874	0.753444	0.85978
	37	0.849228	0.814027	0.846857	0.812143	0.797765	0.725095	0.773622	0.837587	0.80923	0.86173	0.747938	0.772514	0.840415	0.726384	0.76764	0.812332
	38	0.867355	0.869842	0.85538	0.787743	0.788518	0.753511	0.762562	0.807579	0.789309	0.758893	0.742405	0.823977	0.810877	0.692594	0.79035	0.8341
	39	0.938409	0.883826	0.853357	0.84966	0.792615	0.788005	0.742486	0.749171	0.778405	0.808921	0.829923	0.841046	0.890355	0.840214	0.820001	0.825657
	40	0.872487	0.872433	0.858648	0.781136	0.784933	0.738099	0.783437	0.691338	0.737843	0.774946	0.849175	0.837034	0.844845	0.740675	0.857124	0.742042
	41	0.786047	0.859455	0.866577	0.757796	0.80521	0.732116	0.754253	0.784806	0.802707	0.844022	0.849462	0.76679	0.821346	0.794891	0.806328	0.863314
	42	0.760429	0.897406	0.855301	0.828292	0.830476	0.678086	0.796859	0.762764	0.765002	0.783495	0.828751	0.847102	0.754018	0.711144	0.844214	0.877408
	43	0.756707	0.910795	0.857828	0.825645	0.817339	0.713118	0.777841	0.700518	0.783916	0.809923	0.788639	0.817247	0.77584	0.77525	0.766156	0.875969
	44	0.745883	0.895639	0.841824	0.847153	0.807544	0.682198	0.715293	0.713194	0.813254	0.787082	0.840843	0.87999	0.746042	0.699932	0.726404	0.799047
	45	0.749725	0.893724	0.849317	0.83041	0.833978	0.755239	0.768903	0.713295	0.816896	0.752765	0.820336	0.829765	0.754879	0.687283	0.791691	0.779605
	46	0.717299	0.876352	0.853435	0.773158	0.84049	0.737996	0.783167	0.777409	0.796638	0.873687	0.746099	0.793251	0.771981	0.745927	0.736768	0.712016
	47	0.697314	0.8249	0.816552	0.745771	0.846803	0.742306	0.776307	0.747885	0.795743	0.815739	0.82621	0.808291	0.712558	0.66082	0.712718	0.72961
	48	0.754966	0.788928	0.86379	0.687351	0.858486	0.820879	0.758502	0.720238	0.761502	0.813542	0.827288	0.753544	0.694597	0.654921	0.748278	0.697979
Q	Cycle time	OA								SA
	dark		0.904529	0.86909	0.843842	0.831821	0.793938	0.825846	0.772737	0.819337	0.873771	0.870276	0.863106	0.87422	0.869526	0.8181	0.831406	0.834721
	light		0.858487	0.792571	0.825157	0.775912	0.793299	0.793773	0.756506	0.740167	0.780018	0.764962	0.858903	0.780104	0.772143	0.714171	0.820874	0.782098
	dark		0.872091	0.883168	0.873522	0.853264	0.811217	0.828739	0.787619	0.827051	0.89558	0.878963	0.895236	0.909884	0.828289	0.767473	0.816916	0.849537
	light		0.800453	0.872008	0.855224	0.805953	0.809582	0.735196	0.765177	0.760077	0.797052	0.812931	0.808078	0.82709	0.788724	0.740466	0.780981	0.809106
