# Supplementary material for: Diet containing stearic acid increased food intake in mice by reducing serum leptin compared with oleic acid
Source: Royal Society of Chemistry journal article supplement (doi:10.1039/d2fo03051a), 2022-12-22
Supplement: d2fo03051a7.xlsx [file d2fo03051a7.xlsx]

## Sheet: Sheet1
C	c-Fos/NPY-GFP (%)
	OA	SA
	11.6667	29
	22.9167	21.2766
	5.20833	26.7327
	12.8	12.766
	8.13953	10.4762
	21.5385	15.9091
	6.06061	18.6275
	2.08333	10
	8	24.1379
	12.9032	22.2222
	2.66667	8.13953
	10.4762	13.3333
	6.08696
D	c-Fos/POMC-GFP (%)
	OA	SA
	12.2137	27.2727
	11.3636	39.5833
	33.3333	25.7143
	21	18.8172
	34.2857	30
	25.8065	23.8938
	8.06452	32.6087
	25.3968	15.0442
	16.6667	17.8218
	56.1403	21.3636
	8.53659	17.284
	12.2222	28.972
	27.907
	11.4286
E	Serum leptin (ng/ml)
	OA	SA
	6.724	5.992
	6.864	3.038
	6.9	2.874
	7.866	5.062
	6.292	4.4
	5.78	4.19
	5.362
H	p-JAK2/JAK2 protein level
	OA	SA
	1.02432	0.954685
	1.17763	0.794479
	0.980725	0.997717
	0.89005	0.842198
	0.896294	0.724837
	1.03097	0.690245
I	p-STAT3/STAT3 protein level
	OA	SA
	1.04233	0.967708
	1.05266	0.880148
	0.978295	0.931824
	1.00003	0.946215
	0.844581	0.893782
	1.0821	0.836428
K	p-STAT3/NPY-GFP (%)
	OA	SA
	0.470588	0.533333
	0.555556	0.373134
	0.8	0.293333
	0.738095	0.181818
	0.777778	0.189189
	0.9	0.3
	0.552239	0.185185
	0.454545	0.153061
	0.364865	0.351351
	0.672897	0.660714
	0.780822	0.363636
	0.414634	0.539683
	0.644737	0.212766
	0.638889	0.375
	0.791667	0.428571
	0.538462	0.367925
	0.453333	0.471698
	0.683761	0.571429
	0.791667	0.441176
	0.78	0.574074
	0.620253	0.43662
	0.701299	0.714286
	0.588235	0.483146
	0.568627	0.415385
		0.304348
		0.454545
		0.192308
L	p-STAT3/POMC-GFP (%)
	0.419355	0.411765
	0.3846	0.3684
	0.5333	0.6667
	0.5385	0.6875
	0	0
	0.61	0.59375
	0.581	0.6154
	0.375	0.75
	0.464286	0.695652
	0.535714	0.526316
N	Food intake (g)	OA+saline						SA+saline						OA+leptin						SA+leptin
	7	17.64	18.11	16.27	14.42	16.53	14.88	21.2	19.11	18.83	19.96	18.61	17	19.12	17.8	16.89	16.73	15.11	14.5	20.83	21.56	19.83	16.56	18.04	18.87
	14	22.05	21.46	18.6	18.64	20.96	21.75	27.6	23.1	26.31	22.39	21.81	25.09	21.45	21.45	18.99	20.1	23.89	20.15	26	28.03	24.53	22.38	24.77	26.38
	21	17.84	17.99	17.26	18.21	20.71	18.29	24.81	23.57	21.63	22.78	24.49	22.16	17.47	18.72	17.15	16.7	19.54	22.18	18.63	17.74	22.71	21.32	19.79	20.27
O	Body weight (g)	OA+saline						SA+saline						OA+leptin						SA+leptin
	0	24.81	21.87	21.77	20.78	20.6	19.56	24.03	22.08	21.69	20.99	20.58	19.76	23.02	22.16	21.64	21.04	20.56	20.18	22.66	22.36	21.23	21.15	20.45	20.28
	7	26.02	22.48	22.43	21.08	21.55	19.72	25.49	23.18	22.48	22.64	21.52	20.36	24.82	23.75	22.92	23.04	21.13	20.92	24.57	23.34	22.75	21.57	21.48	21.05
	14	25.56	22.76	22.38	21.43	22.78	20.65	25.63	23.36	22.6	22.66	20.65	21.72	25.19	23.93	23.03	22.6	22.14	21.25	23.63	22.98	22.48	21.58	22.48	21.14
	21	25.2	23.12	22.99	22.31	23.33	20.46	25.66	23.66	22.64	22.95	21.62	21.2	24.74	23.8	22.65	22.59	22.19	24.52	22.52	23.29	22.38	21.29	22.06	20.53
P	Num. P-STAT3 neurons
	OA+saline	SA+saline	OA+leptin	SA+leptin
	307	142	362	267
	209	139	300	204
	181	128	313	180
	256	154	293	215
	193	191	378	255
	159	149	273	213
	238	152	320	218
	290	163	289	182
	230	134	334	197
	227	113	343	239
	257	134	319	246
	103	144	291	260
	219	118	304	218
	193		302
			301
