# Supplementary material for: Diet containing stearic acid increased food intake in mice by reducing serum leptin compared with oleic acid
Source: Royal Society of Chemistry journal article supplement (doi:10.1039/d2fo03051a), 2022-12-22
Supplement: d2fo03051a8.xlsx [file d2fo03051a8.xlsx]

## Sheet: Sheet1
B	Frequency (%)	OA			SA
	<500	14.4562	7.69898	23.9228	22.002	38.4943	62.499
	500-1000	33.4063	27.5796	25.5908	22.1556	19.8784	20.8849
	1000-1500	24.7389	24.0946	19.8878	19.0778	12.7842	10.418
	1500-2000	16.9872	21.433	16.518	15.6191	7.60047	3.72265
	2000-2500	5.92278	8.84422	8.06067	10.0853	10.4486	2.08195
	2500-3000	2.08186	5.58451	3.92208	5.23888	7.01143	0
	3000-3500	0.724638	1.94559	1.82004	3.47201	2.92969	0.208333
	3500-4000	0.362319	1.74993	0	1.47806	0.614844	0.185185
	>4000	1.31988	1.06952	0.277778	0.871212	0.238095	0
C	iWAT Leptin mRNA level
	OA	SA
	2.03102	0.568047
	0.69637	0.56226
	1.19158	0.732631
	0.849208	0.231387
	0.552644	0.619138
	0.679181	0.67604
	1.10132	0.603255
	1.72592	0.366961
E	Frequency (%)	OA			SA
	<1000	0	0.142857	0	0	0	0
	1000-1500	0	0.0714286	0.0769231	0	0.235294	0.176471
	1500-2000	0.0909091	0.142857	0.153846	0.333333	0.235294	0.235294
	2000-2500	0.181818	0.214286	0.153846	0	0.235294	0.235294
	2500-3000	0	0.214286	0.230769	0.111111	0.176471	0.294118
	3000-3500	0.181818	0.0714286	0.153846	0.111111	0.0588235	0.0588235
	3500-4000	0.272727	0.0714286	0.0769231	0	0	0
	4000-4500	0.181818	0	0.0769231	0.111111	0	0
	>4500	0.0909091	0.0714286	0.0769231	0.333333	0.0588235	0
F	eWAT Leptin mRNA level
	OA	SA
	1.56005	1.12975
	0.283655	0.805603
	0.484265	0.734845
	1.81297	0.881305
	0.896299	1.82988
	0.962754	1.12057
G	eWAT Relative mRNA level	OA						SA
	Scd1	1.35749	0.36585	0.90289	0.920386	1.22781	1.22558	1.08649	0.980696	0.574454	1.55738	1.73589	0.843123
	Fasn	1.32567		0.655999	1.15821	1.03919	1.52203	1.09071	1.04797	0.789845	2.76776	1.84069	1.12291
	Acaca	1.23864	0.425942	0.724001	1.24812	1.06037	1.30292	0.939557	0.933763	0.675418	2.38993	1.3477	0.723372
	Atgl	1.09945	0.640568	1.03184	1.24075	0.918373	1.06902	1.10962	0.927545	0.394274	1.01015	1.57015	0.785856
	Hsl	0.426232		0.48947	1.04911	0.513361	2.52183	2.2154	1.16987	0.593435		1.60026	0.483209
	Acacb	1.79997	0.489803	0.56874	0.900482	0.921526	1.31948	1.07328	0.863103	0.67167	2.05109	1.97536	1.42266
H	iWAT Relative mRNA level	OA						SA
	Scd1	1.55382	0.842237	0.892173	0.692555		0.573709	0.7987	0.814291	0.989252	0.849766	1.09276	0.283161
	Fasn	1.34331	0.959668	0.840579	0.480378		0.451985	0.727045	1.04973	0.917048	1.47797	1.41826	0.306991
	Acaca	1.08897	0.908974	0.888978	0.603267		0.379934	0.521409	0.818048	0.91558	1.48464	1.09538	0.308675
	Atgl	1.09526	0.990958	1.31688	0.486407		0.693387	0.654451	0.818116	0.714324	0.841754	1.06718	0.245112
	Hsl		0.72352	1.28804	0.723576		0.688667	1.24275	0.553709	0.943741	0.337103	1.06168	0.197109
	Acacb	1.42979	0.716604	0.67848	0.458858		0.537587	0.652436	0.879073	0.84664	1.25519	1.31416	0.389231
I	Liver Relative mRNA level	OA						SA
	Scd1	1.20808	0.648976	1.33135	1.00638	0.66398	1.14123	1.75104	1.09018	1.33287	0.709963	0.897687	1.19951
	Fasn	0.879406	0.675471	0.718895	1.38694	0.494445	1.84485	0.960699	1.02312	1.3317	0.771386	1.0219	1.32486
	Acaca	1.25766	0.793765	0.490668	1.44885	0.693579	1.31548	1.22314	1.1494	1.52262	1.02349	0.914631	1.27085
	Atgl	0.999633	0.803777	0.73984	1.00021	0.791332	1.6652	0.638475	1.53163	1.30593	1.21875	1.16203	1.07755
	Hsl	1.14594	1.34584	0.89678	0.977071	0.443001	1.19136	1.03867	0.869895	1.45541	0.998631	1.15232	1.39164
	Acacb	0.537753	0.788666	1.26488	1.08437	0.805475	1.51885	1.53663	0.864813	0.971637	0.658799	0.898364	0.988808
J	Liver Relative mRNA level	OA						SA
	GPR40		0.301402	0.843187	0.677293	0.376237	0.963615	0.295544	0.66478	1.18023	0.656748	0.777019	1.67337
	GPR41	2.50511	0.744648	0.413229	0.857031	0.210596	1.26939	0.581907	0.902263	2.86364	0.804737	0.709701	1.59505
	GPR43	2.78807	0.573209	0.721947	0.664252	0.236807	1.01572	0.374539	0.62032	1.21358	0.759148	1.01416	1.24685
	GPR120	1.39742	0.955682	0.836763	1.25935	0.531143	1.01964	0.733636	1.06914	3.57431	1.03379	0.963876	1.73619
K	iWAT Relative mRNA level	OA						SA
	GPR40	1.30461	0.828686	1.09345	1.03066	1.02903	0.713563	0.883111	0.771603	0.784758	0.541569	1.24266	0.16123
	GPR41		0.757509	0.925334	0.991311	0.492199	0.638799	0.834165	0.458786	0.876392	0.55312	0.522734	0.146854
	GPR43	1.30197	0.840383	1.17001	0.875009	1.08009	0.732534	1.21334	0.787931	1.04596	0.455995	1.05172	0.262704
	GPR120	1.13177	0.907279	1.04206	0.991882	1.05676	0.870258	0.870962	0.839332	1.41	0.647717	1.16505	0.245483
