# Supplementary material for: Diet containing stearic acid increased food intake in mice by reducing serum leptin compared with oleic acid
Source: Royal Society of Chemistry journal article supplement (doi:10.1039/d2fo03051a), 2022-12-22
Supplement: d2fo03051a9.xlsx [file d2fo03051a9.xlsx]

## Sheet: Sheet1
A	Transcription factors	OA						SA
	SREBP1	1.30257	0.768637	1.14445	0.720738	1.30118	0.762434	0.555495	0.653044	0.636578	0.586686	0.87473	0.307217
	ADD1	1.11975	1.01899	0.648758	0.924772	1.39882	0.888912	0.607541	0.895904	0.900103	0.780001	0.797386	0.497791
	AP-2β	1.84662	0.916915	0.834914	0.984297	0.699411	0.717841	0.748113	0.520606	0.895144	0.316175	1.15999	0.444311
	C/EBPα	1.0078	1.4438	0.721485	0.800359	1.11813	0.908419	0.81497	1.04884	1.43745	0.919369	1.22503	0.602961
	FOSL2	0.587557	0.889787	1.55954	1.11885	1.08363	0.760643	1.07951	0.644876	0.913064	0.627348	0.938846	0.572936
B	Transcription factors	OA						SA
	SREBP1	1.11908	0.880912	0.476464	1.09358	1.00419	0.931016	1.09267	0.794303	1.24414	1.2939	0.657841	1.02932
	ADD1	1.49992	0.618073	0.904077	0.708493	1.17909	1.09035	1.11632	0.965222	0.757528	1.51633	1.32808	1.21191
	AP-2β	0.223101	0.723678		0.806208	0.247983	1.1218		0.572857	0.379496	1.50361	0.563622
	C/EBPα	1.18392	0.363602	0.448976	1.79391	0.96754	1.24205	0.68185	0.992243	0.903385	1.00705	1.37179	0.890735
	FOSL2	1.35722	0.354104	1.07203	1.28615	0.911088	1.0194	0.878648	0.866953	0.97504	0.809329	1.05967	0.717351
C	Serum total cholesterol (mmol/L)
	OA	SA
	4.41	3.61
	4.102	3.629
	5.088	3.357
	5.088	3.068
	4.503	3.161
	5.088	3.201
	5.088	3.35
	4.296	3.166
	4.779	3.301
	5.083	3.091
	4.562	2.723
	4.564	3.243
D	Serum LDL-C (mmol/L)
	OA	SA
	0.478661	0.20251
	0.515481	0.276151
	0.552301	0.1841
	0.340586	0.377406
	0.579916	0.276151
	0.312971	0.174895
	0.469456	0.322176
	0.432636	0
	0.662762	0
	0.598326	0.220921
	0.460251	0.276151
	0.506276	0.266946
	0.1841	0.1841
	0.331381	0.156485
	0.294561	0.239331
E	Serum HDL-C (mmol/L)
	OA	SA
	7.78788	4.27273
	8.42424	8.0303
	8.06061	4.33333
	7.42424	7.33333
	7.33333	5.36364
	5.87879	7.66667
	9.45455	6.75758
	7.57576	6.42424
	7.42424	5.63636
	8	4.36364
	7.06061	6.60606
	8.12121	5.0303
	6.0303	3.69697
	6.60606	5.48485
	6.33333	5.60606
F	Relative mRNA level	OA						SA
	Cyp3a11	1.47113	0.789796	0.911498	0.792819	1.01257	1.02218	0.297632	0.998714	0.781686	0.406838	0.694579	0.525317
	Cyp3a13	1.27997	0.852814	1.01033	0.740229	0.853945	1.26271	0.825385	1.52413	1.02215	1.15977	1.26719	0.597224
	OSBP	1.37321	0.807895	0.866738	0.979616	1.1769	0.795638	0.630396	1.04753	0.844221	0.748821	0.782055	0.594357
G	Relative mRNA level	OA						SA
	Cyp3a11	0.498874	0.562064		0.96568	0.0662357	0.0490986	0.0147733	0.0296207	0.335758	0.00430665	0.240058	0.0100025
	Cyp3a13	0.673806	0.729053		0.850284	0.20059	0.248411	0.167139	0.120583	0.356677	0.0997594	0.482381	0.234939
	OSBP	1.39613	0.910454	0.98906	0.761903	1.21252	0.729938	0.843035	0.814273	0.925795	0.719279	1.01556	0.941334
K	SREBP1 protein level
	OA	SA
	1.42237	0.902541
	1.08198	0.776379
	0.791406	0.5132
	1.04996	0.533318
	1.14651	0.908444
	0.823987	0.7505
	0.683784	0.907897
		0.582975
M	SREBP1 protein level
	OA	SA
	1.12365	1.22244
	0.378497	1.14026
	1.44053	1.25321
	1.39509	1.37152
	0.628201	0.992712
	1.03403	1.55541
O	LXR-α protein level
	OA	SA
	1.32865	1.01222
	0.666443	0.44627
	0.826501	0.822667
	1.195	0.602922
	1.22777	0.694988
	0.961229	0.923704
	0.794404	0.806226
		0.724431
Q	LXR-α protein level
	OA	SA
	0.599813	0.837498
	1.23633	0.317658
	1.30192	0.270186
	1.43125	0.707744
	0.714064	0.51404
	0.716623	0.558556
