# Supplementary material for: Diet containing stearic acid increased food intake in mice by reducing serum leptin compared with oleic acid
Source: Royal Society of Chemistry journal article supplement (doi:10.1039/d2fo03051a), 2022-12-22
Supplement: d2fo03051a10.xlsx [file d2fo03051a10.xlsx]

## Sheet: Sheet1
A	Serum triglyceride (μmol/L)
	OA	SA
	1412.15	986.55
	925.76	802.02
	787.28	928.44
	1179.19	1031.6
	1465.45	1221.14
	942.3	823.35
	1015.61
B	Serum FFA (μmol/L)
	OA	SA
	884.545	881.675
	802.62	797.6
	773.7	741.765
	767.005	776.09
	806.92	804.41
	836.42	818.025
	900.07
C	Serum fatty acid concentration (mg/kg)	OA			SA
	Oleic acid	429.6	206.56	199.38	300.17	339.91	281.47
	Stearic acid	346.31	269.8	249.74	263.22	214.1	332.47
E	Fecal fatty acid concentration (×103mg/kg)	OA			SA
	Olieic acid	1.49242	1.19106	1.20903	1.72288	0.83773	1.07444
	Stearic acid	1.01983	1.19179	4.42764	111.773	68.1887	66.7972
F		OA						SA
	Document	1.22719	1.0689	1.24844	0.508989	0.946419	1.00006	0.59391	0.520583	0.738795	0.490935	0.526821	0.558082
	Jecument	0.954773	1.21353	0.843276	0.703588	1.01409	1.27075	1.13113	0.712178	0.833428	0.641911	0.607197	1.03098
	Ileum	0.936374		0.739603	1.37164	0.832045	1.12034	1.00573	0.543968	0.803381	1.03554	1.18044	0.849545
	Liver	1.30154	0.701698	1.02607	1.05654	0.970709	0.943439	0.790977	0.887095	1.2314	0.920985	0.801631	0.711621
	iWAT	1.00392	0.924309	0.999738	0.792641	1.39286	0.886536	0.905919	1.04936	0.950631	1.16194	1.19288	0.815533
	eWAT	1.07376	0.812668	1.04951	1.03316	0.806055	1.22486	1.29967	0.871223	0.628939	1.88043	1.31321	0.839824
G	Relative mRNA level	OA						SA
	CD36	0.990025	1.18743	0.91952	0.581791	0.972348	1.34889	0.345249	0.41694	0.59065	0.409715	0.519052	0.517372
	FATP4	0.875945	1.00801	0.958505	0.940949	1.4108	0.805799	0.8982	0.828864	1.39341	1.46802	1.34654	1.00612
H	Relative mRNA level	OA						SA
	CD36	0.738444	0.714633	0.653454	0.551656	1.16244	2.17937	0.503122	0.338002	0.512299	0.627515	0.839226	0.510604
	FATP4	0.677628	1.02627	1.15361	0.727598	1.15834	1.25655	0.765173	0.639699	0.820642	0.579355	0.677828	1.06025
I	Relative mRNA level	OA						SA
	CD36	1.26329		1.1242	1.14168	0.615954	0.854879	0.647956	1.09061	1.73856	0.513978	0.464581	1.40125
	FATP4	0.918945		0.960785	1.0615	0.950868	1.1079	1.0532	0.811145	1.62967	0.914863		0.728913
J	Relative mRNA level	OA						SA
	CD36	0.769538	0.976258	0.862895	0.873744	0.44691	2.07065	0.182473	0.40543	0.57071	0.307775	0.467852	0.507145
	FATP2	0.786181	0.856987	1.05693	1.16719	0.816031	1.31668	0.438416	0.51144	0.638837	0.491433	0.626082	0.776232
	FATP3	1.51815	1.033	0.814457	0.712516	0.74752	1.17436	0.744522	1.12955	1.29353	1.05337	1.24827	1.03237
	FATP5	1.07113	0.952034	0.835733	1.0444	0.689495	1.4072	1.13667	1.4751	1.23003	1.155	0.887629	0.668826
K	Relative mRNA level	OA						SA
	CD36	1.79973	0.466682	0.588631	1.29329	0.976924	0.874735	0.822818	0.99146	0.588037	0.969329	1.886	0.994552
	FATP1	1.68133	0.804397	0.620674	0.896019	1.11916	0.878423	0.964044	0.845313	0.833442	1.88104	2.01744	1.38433
	FATP4	0.986036	0.446826	1.05495	1.17469	0.725791	1.61172	1.38283	1.07409	1.00146	1.61285	1.43727	1.73758
L	Relative mRNA level	OA						SA
	CD36	1.05676	1.14409	1.14902	0.797344	1.07122	0.781566	0.79935	1.09672	1.03323	0.844941	0.840761	0.88542
	FATP1	1.20416	1.13329	0.687566	0.728501	1.61248	0.634012	0.884701	1.06931	1.12117	1.26875	1.02621	1.43145
	FATP4	1.65596		0.864742	0.805559	1.03849	0.635249	0.831451	0.858256	0.863874	0.529917	0.905559	0.866992
