# Supplementary material for: Diet containing stearic acid increased food intake in mice by reducing serum leptin compared with oleic acid
Source: Royal Society of Chemistry journal article supplement (doi:10.1039/d2fo03051a), 2022-12-22
Supplement: d2fo03051a11.pdf [file d2fo03051a11.pdf]

## Supplementary Materials

**Table S1.** Composition of feed.

| <b>Ingredients</b>             | <b>OA diet</b> | <b>SA diet</b> |
|--------------------------------|----------------|----------------|
| Corn (%)                       | 38.214         | 37.855         |
| Secondary powder (%)           | 19.533         | 19.349         |
| Flour (%)                      | 14.650         | 14.512         |
| Soybean meal (%)               | 15.629         | 15.482         |
| Fish meal (%)                  | 3.903          | 3.867          |
| Stone powder (%)               | 1.462          | 1.448          |
| Calcium hydrogen phosphate (%) | 1.952          | 1.933          |
| Salt (%)                       | 0.289          | 0.286          |
| Minerals (%)                   | 0.077          | 0.076          |
| Vitamins (%)                   | 0.034          | 0.033          |
| Choline (%)                    | 0.048          | 0.048          |
| Vitamin E (%)                  | 0.010          | 0.010          |
| Oleic acid (%)                 | 4.200          | 0.000          |
| Stearic acid (%)               | 0.000          | 5.100          |

**Table S2.** PCR Primers for genes.

| <b>genes</b>   | <b>Forward primer (5'-3')</b> | <b>Reverse primer (5'-3')</b> |
|----------------|-------------------------------|-------------------------------|
| ACACA          | GATGAACCATCTCCGTTGGC          | GACCCAATTATGAATCGGGAGT<br>G   |
| ACACB          | CGCTCACCAACAGTAAGGTGG         | GCTTGGCAGGGAGTTCCTC           |
| ACSL5          | TCCTGACGTTTGGAACGGC           | CTCCCTCAATCCCCACAGAC          |
| ADD1           | CCAGGGACGACAGTGATGC           | AGGGGAGGCTACCTCTTCAG          |
| AP-2 $\beta$   | GCGTCCCAAGCCATAGCTC           | ACTCTGGTGGTAGGGTAGCG          |
| ATGL           | GAACAAAGCACAACTTCTGAGC        | CCGCGAGTATCAGGAGAGC           |
| CD36           | ATGGGCTGTGATCGGAACTG          | GTCTTCCAATAAGCATGTCT<br>CC    |
| C/EBP $\alpha$ | CAAGAACAGCAACGAGTACCG         | GTCACTGGTCAACTCCAGCAC         |
| CYP3A11        | GTGCTCCTAGCAATCAGCTT          | CAGTGCCTAAAAATGGCAGAGG        |
| CYP3A13        | GACGATTCTTGCTTACCAGAAG<br>G   | CCGGTTTGTGAAGGTAGAGTAA<br>C   |
| FASN           | GGAGGTGGTGATAGCCGGTAT         | TGGGTAATCCATAGAGCCCAG         |
| FATP1          | CGCTTTCTGCGTATCGTCTG          | GATGCACGGGATCGTGTCT           |
| FATP2          | TCCTCCAAGATGTGCGGTACT         | TAGGTGAGCGTCTCGTCTCG          |
| FATP3          | GGCCCGGATTTCTTTGGATT          | CCCATAGGTGGAGCCCCAT           |
| FATP4          | ACTGTTCTCCAAGCTAGTGCT         | GATGAAGACCCGGATGAAACG         |
| FATP5          | CTACGCTGGCTGCATATAGATG        | CCACAAAGGTCTCTGGAGGAT         |
| FOSL2          | CCAGCAGAAGTTCGGGGTAG          | GTAGGGATGTGAGCGTGGATA         |

|                |                         |                         |
|----------------|-------------------------|-------------------------|
| GPR40          | GCTTCCATTGAACTTGTTAGCC  | CGCTGAGAGCAGCTAGGAAG    |
| GPR41          | CTTGATCCTCACGGCCTACAT   | CCAGGGTCAGATTAAGCAGGAG  |
| GPR43          | CTTCTTTCTTGGCAATTACTGGC | CCGAAATGGTCAGGTTTAGCAA  |
| GPR120         | ACCAAGTCAATCGCACCCAC    | GTGAGACGACAAAGATGAGCC   |
| HSL            | TCCCTCAGTATCTAGGCCAGA   | GGCTCATTTGGGAGACTTTGTTT |
| Leptin         | GAGACCCCTGTGTCGGTTC     | CTGCGTGTGTGAAATGTCATTG  |
| SCD1           | TTCTTGCGATACTCTGGTGC    | CGGGATTGAATGTTCTTGTCGT  |
| OSBP           | AATGAACGAGCCACGCTTTTT   | CTGGGCTAACATGAGGAAATCT  |
|                |                         | C                       |
| SREBP1         | TGACCCGGCTATTCCGTGA     | CTGGGCTGAGCAATACAGTTC   |
| $\beta$ -actin | GGCTGTATTCCCCTCCATCG    | CCAGTTGGTAACAATGCCATGT  |

---

**Fig. S1 Expression of ribosome production related genes in enterocyte of mice.**

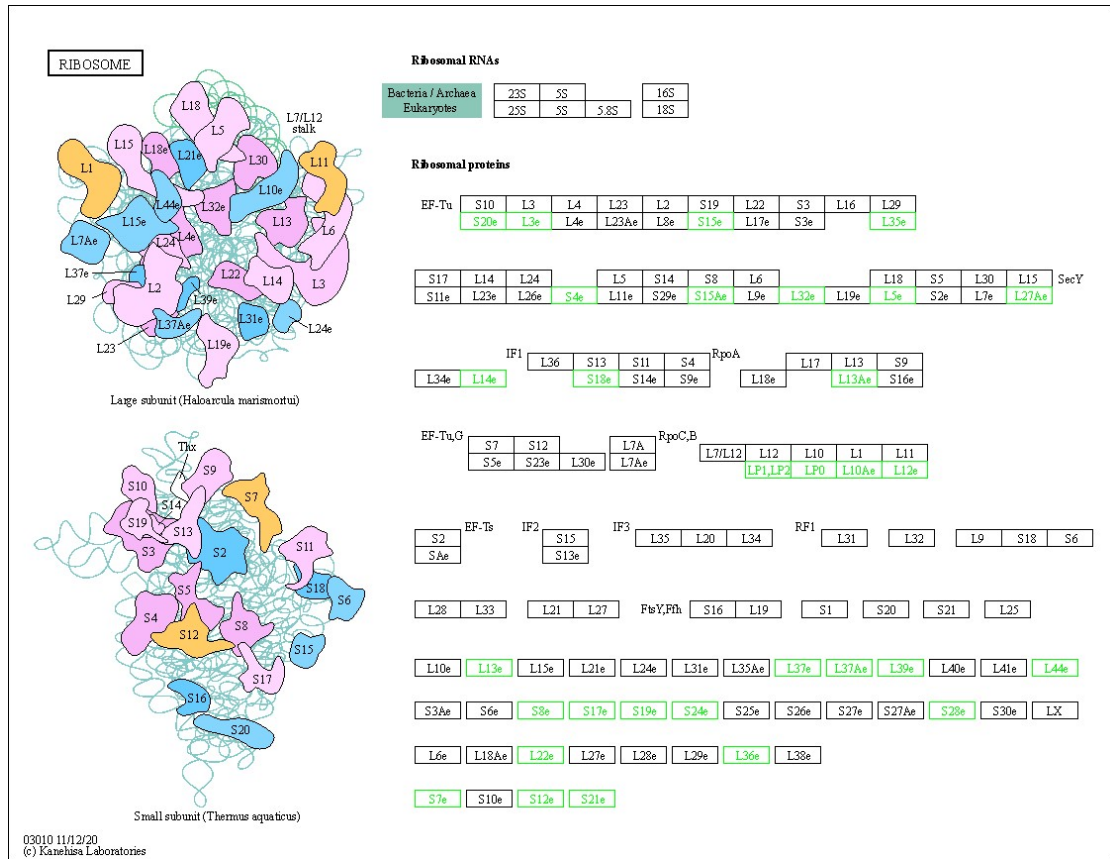

Note: green represents low-expressed genes.

**Fig. S2 Expression of cell cycle related genes in enterocyte of mice.**

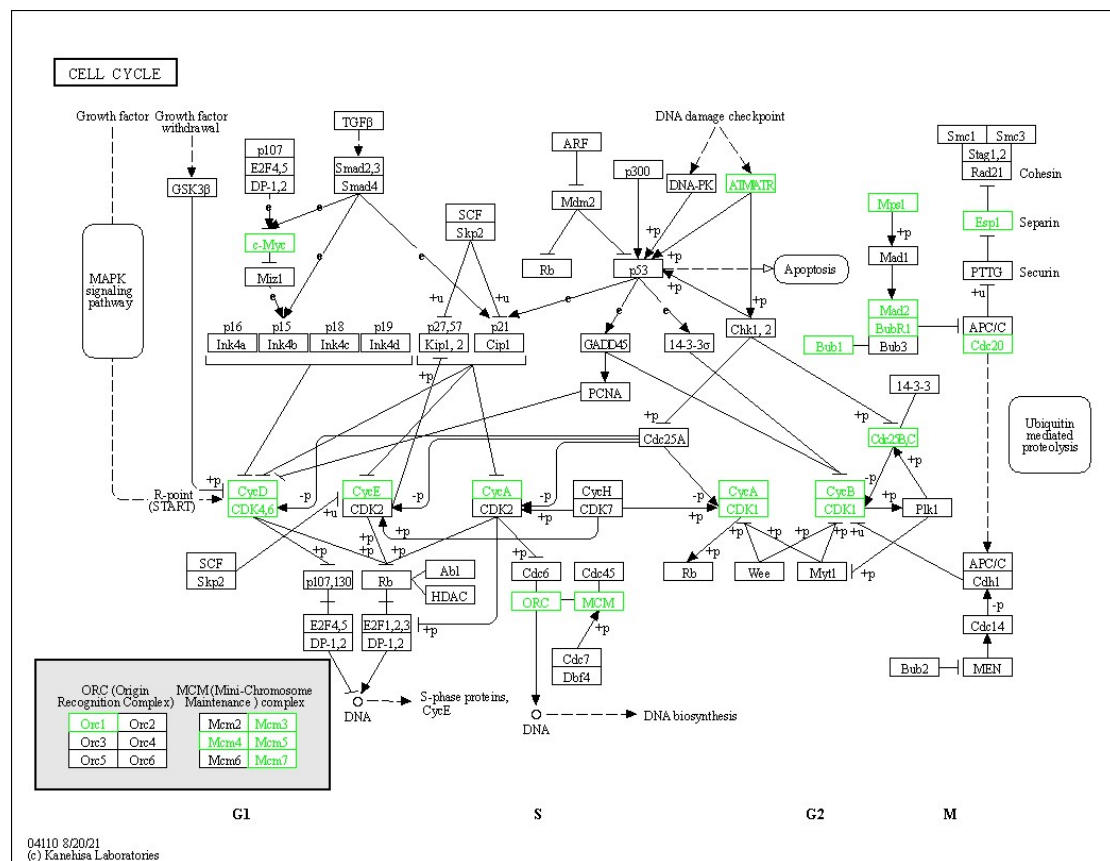

Note: green represents low-expressed genes.

**Fig. S3 Expression of hematopoietic cell lineage related genes in enterocyte of mice.**

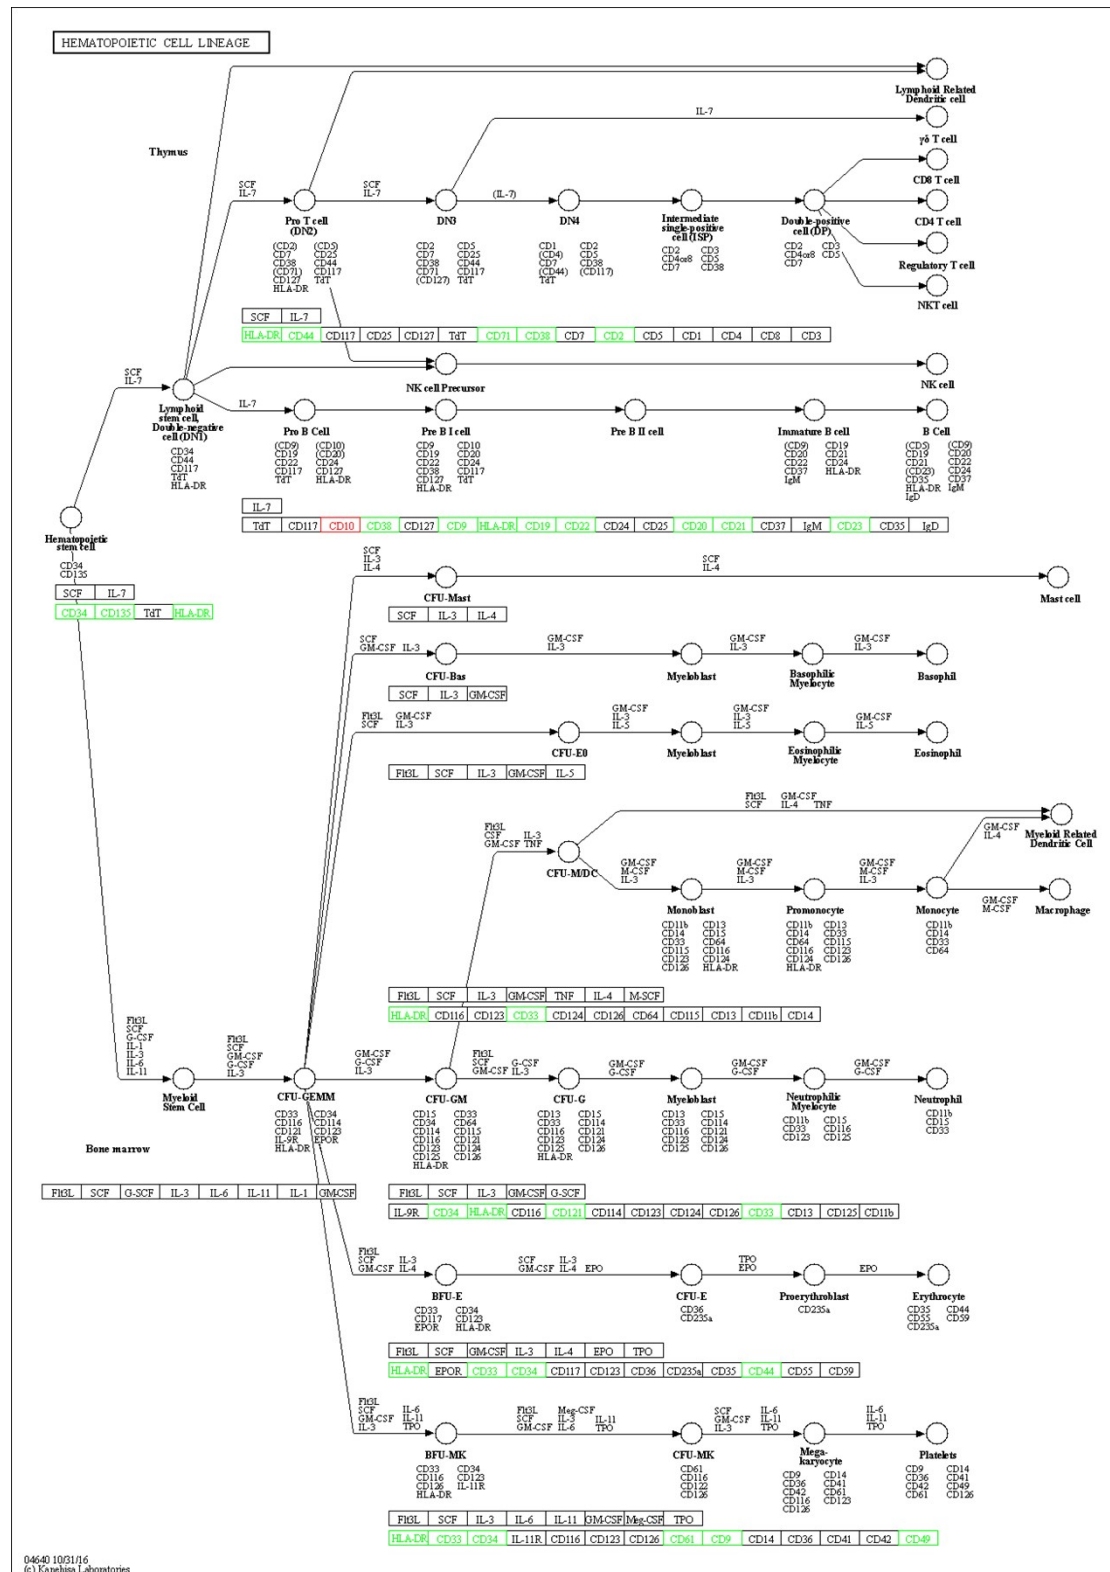

Note: red represents high-expressed genes, and green represents low-expressed genes.

**Fig. S4 Expression of antifolate resistance related genes in enterocyte of mice.**

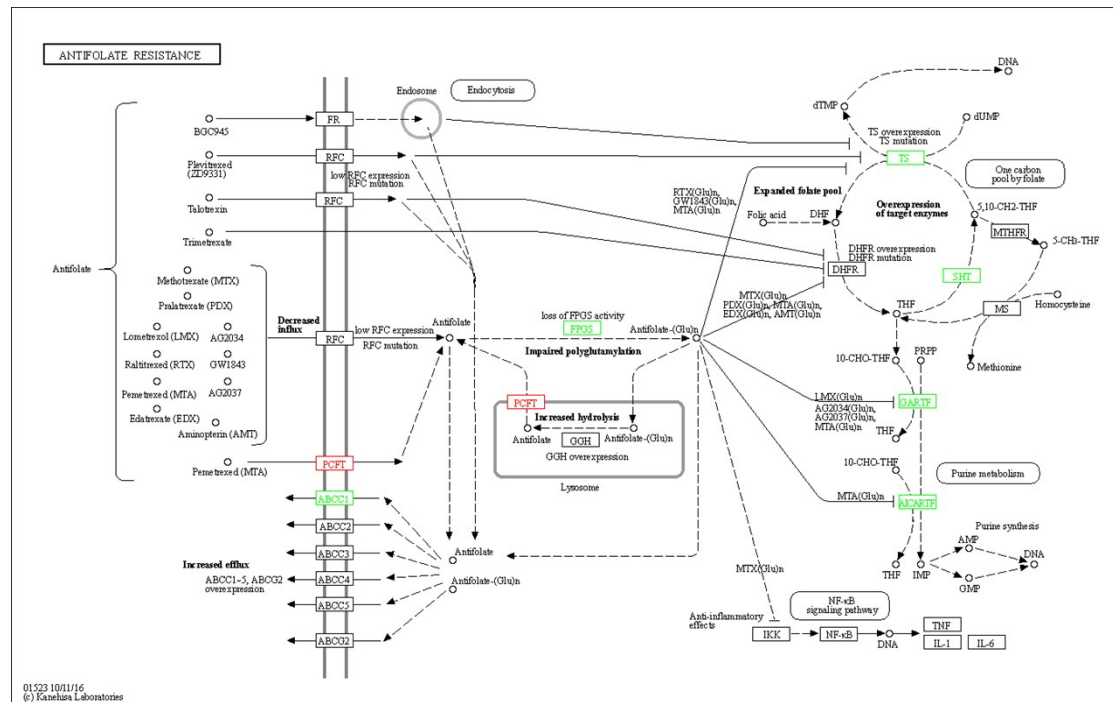

Note: red represents high-expressed genes, and green represents low-expressed genes.

Western blot image:

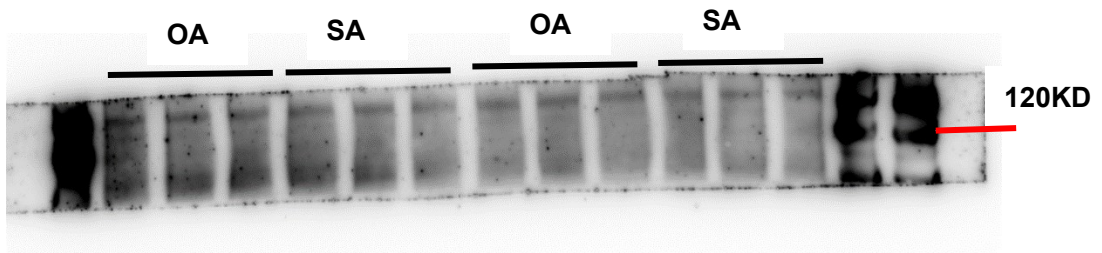

#1: p-JAK2

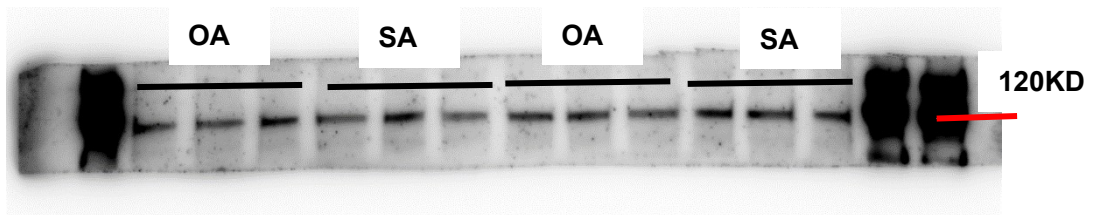

#2: JAK2

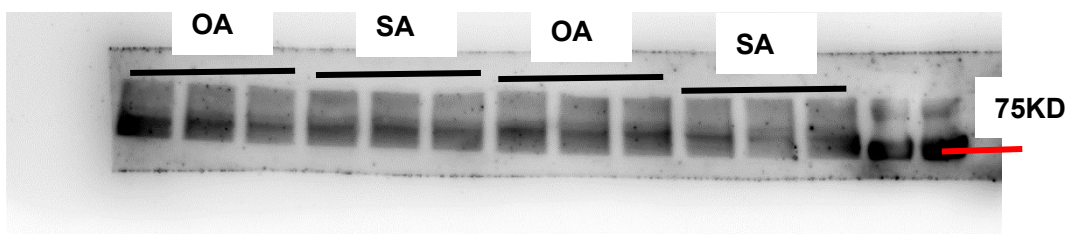

#3: p-STAT3

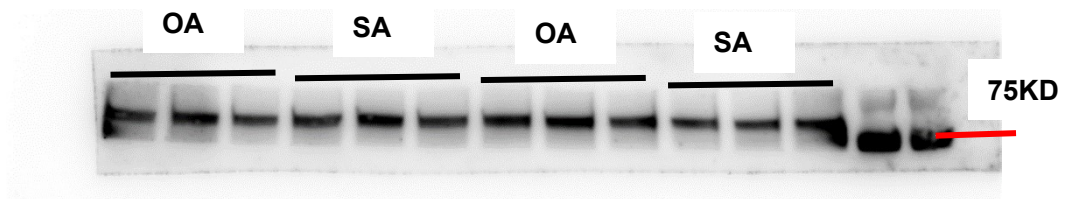

#4: STAT3

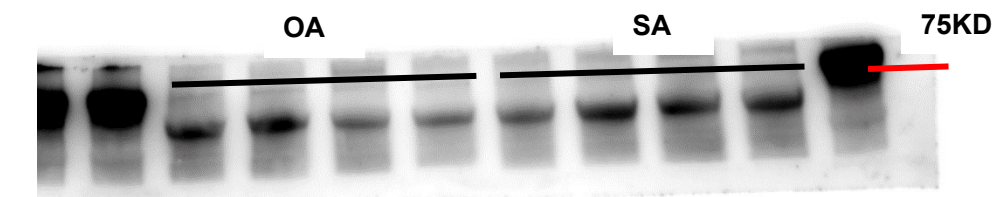

#5: iWAT-SREBP-1c

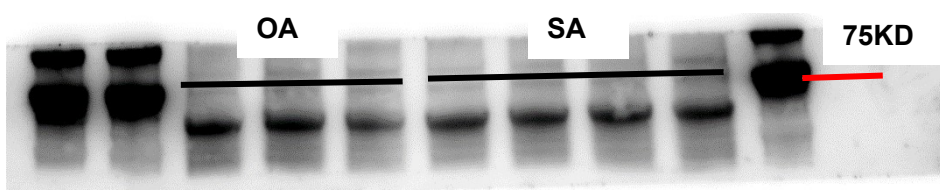

#6: iWAT-SREBP-1c



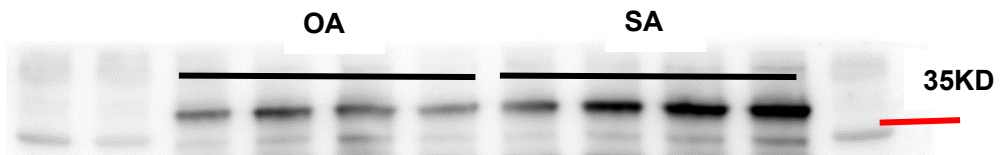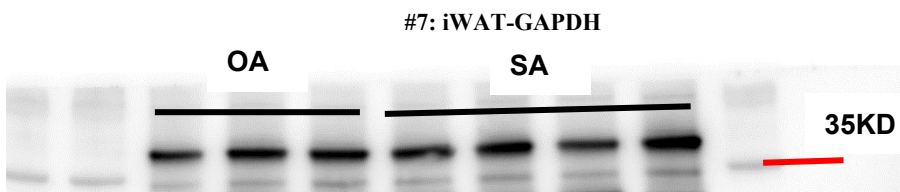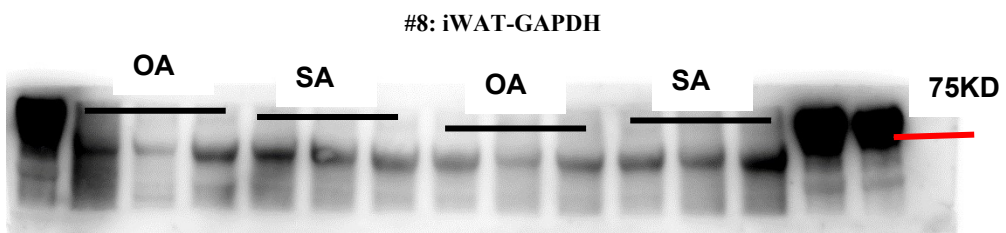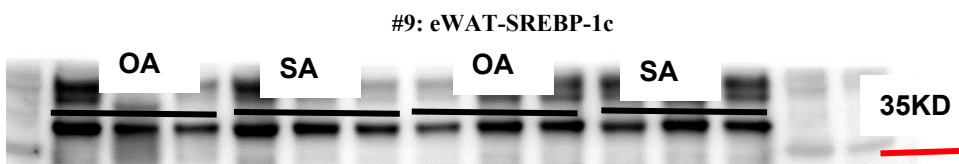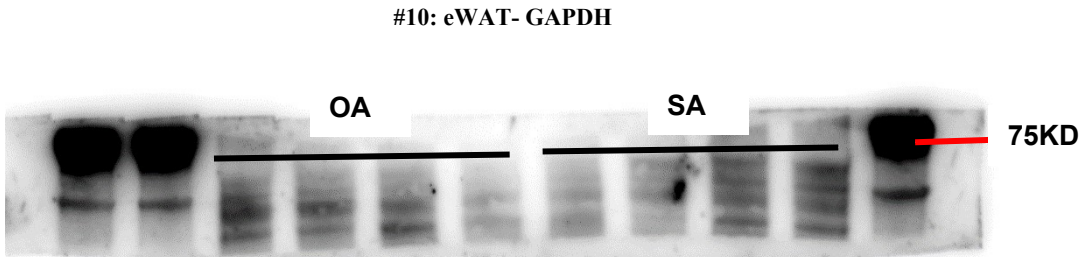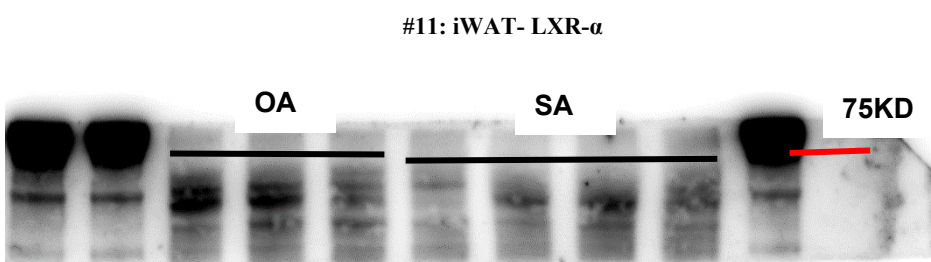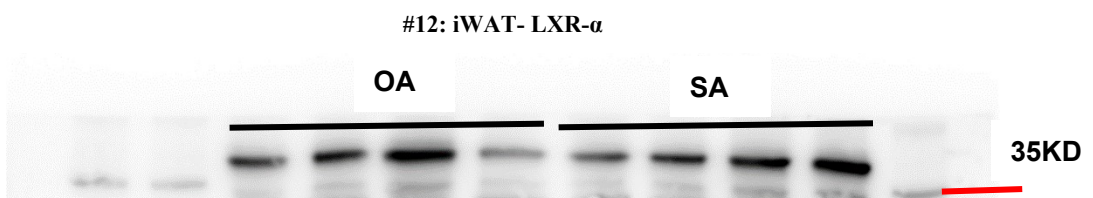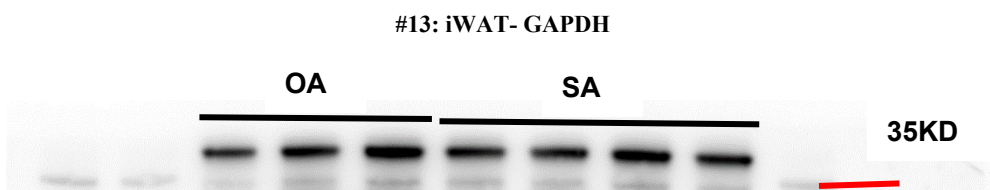

#14: iWAT- GAPDH

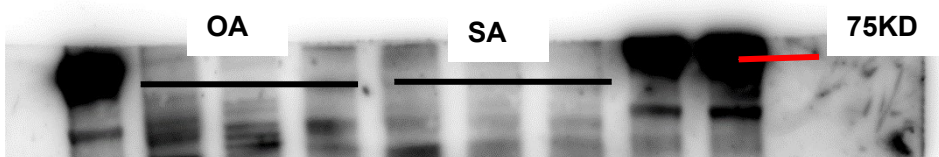

#15: eWAT- LXR- $\alpha$

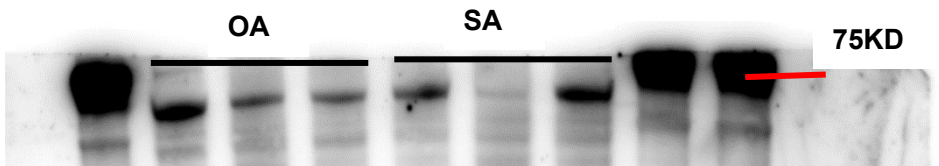

#16: eWAT- LXR- $\alpha$

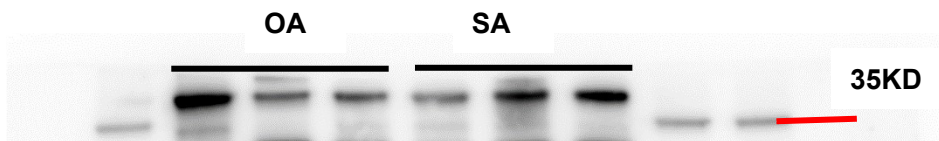

#17: eWAT- GAPDH

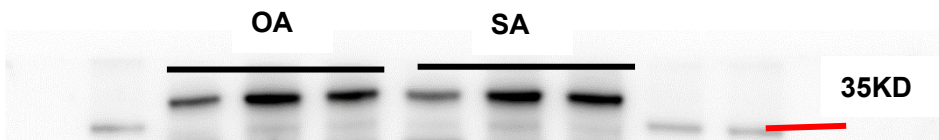

#18: eWAT- GAPDH
