# Supplementary figures and images for: Diet containing stearic acid increased food intake in mice by reducing serum leptin compared with oleic acid
Source: Royal Society of Chemistry journal article supplement (doi:10.1039/d2fo03051a), 2022-12-22

**CELL CYCLE**

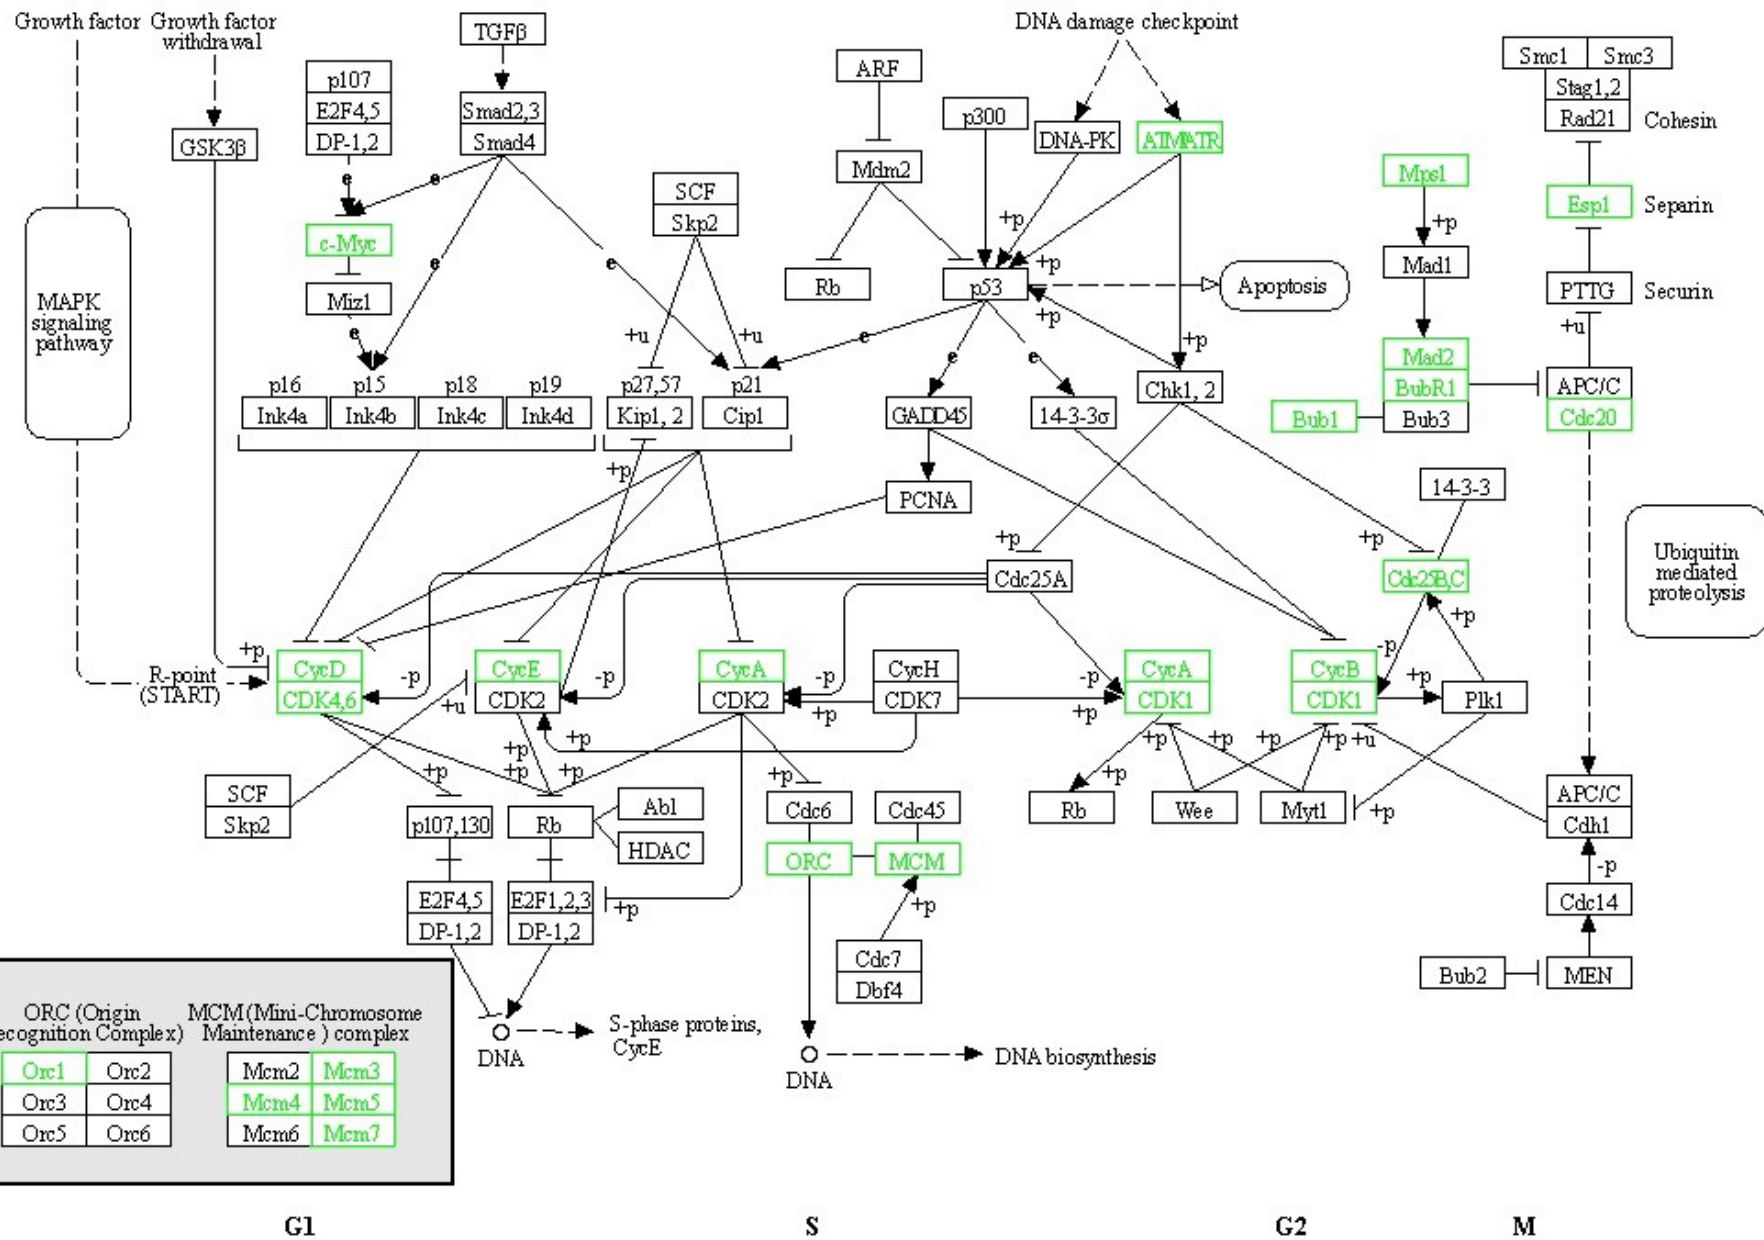

Supplement: d2fo03051a3.pdf [file d2fo03051a3.pdf]

ANTIFOLATE RESISTANCE

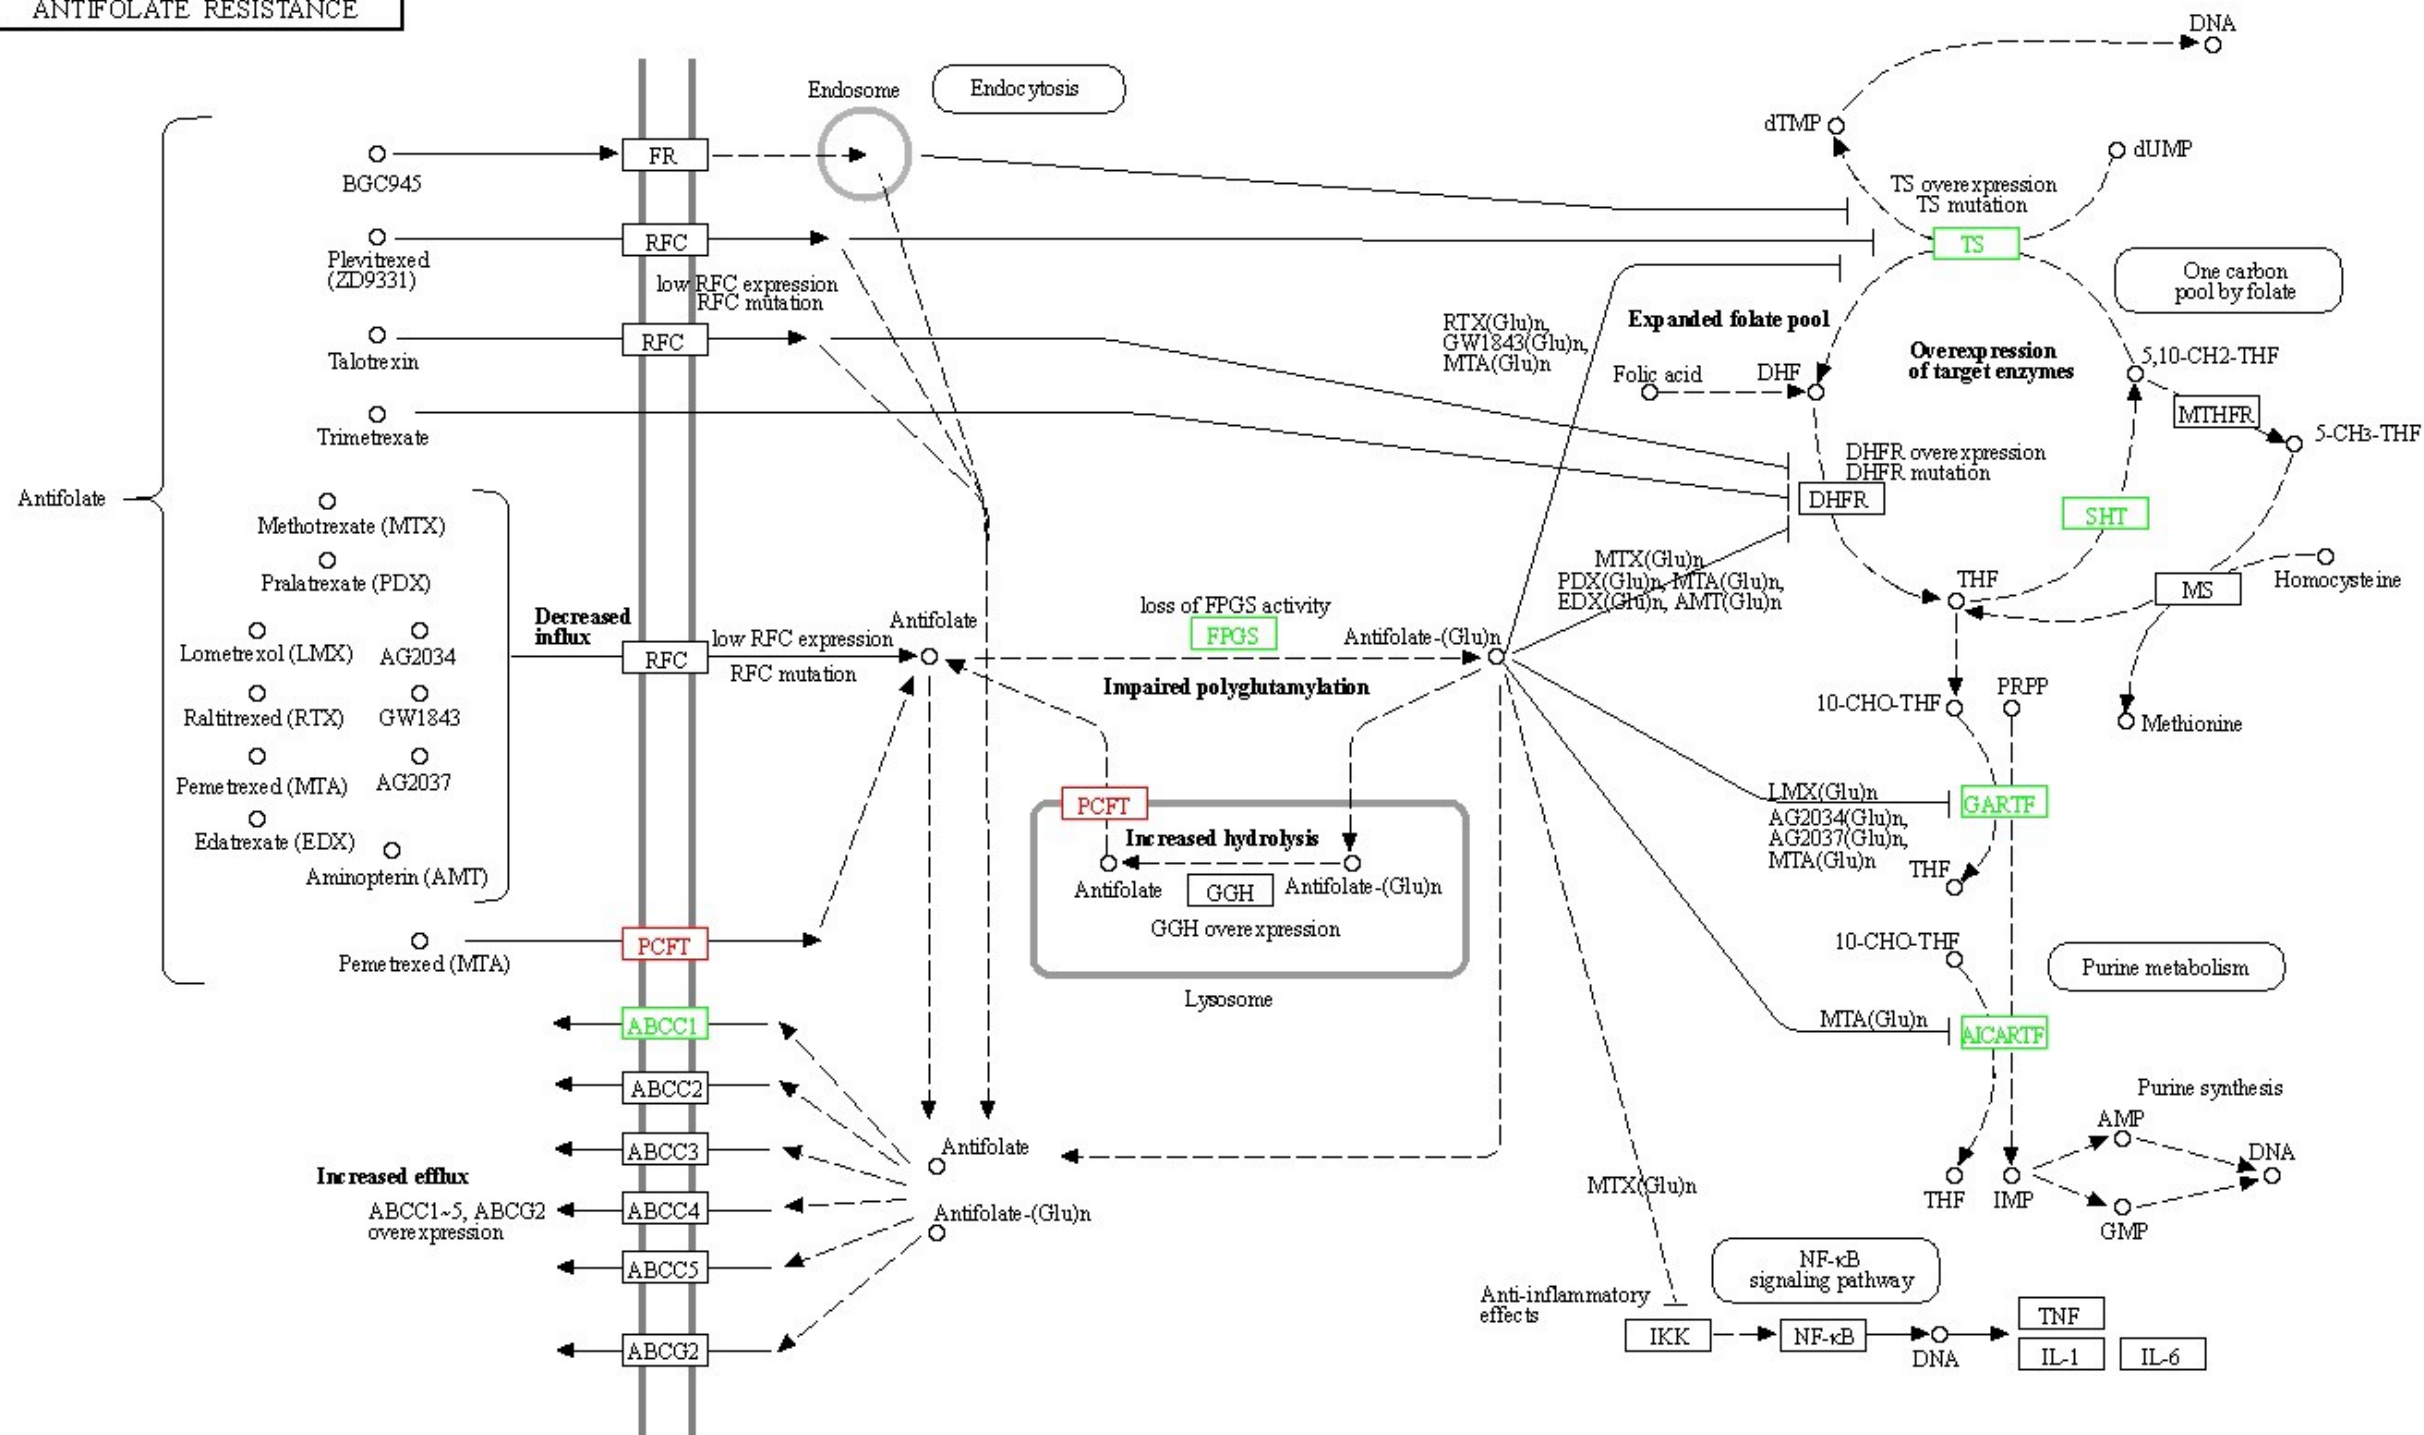

Supplement: d2fo03051a5.pdf [file d2fo03051a5.pdf]
